# Supplementary material for: Sequential stages and distribution patterns of aging-related tau astrogliopathy (ARTAG) in the human brain
Source: Springer Nature journal article supplement (doi:10.1186/s40478-018-0552-y), 2018-06-11
Supplement: MOESM2 [file 25666420]

# Sequential stages and distribution patterns of aging-related tau astroglialopathy (ARTAG) in the human brain

Gabor G. Kovacs<sup>1,2</sup>, Sharon X. Xie<sup>3</sup>, John L. Robinson<sup>2</sup>, Edward B. Lee<sup>2</sup>, Douglas H. Smith<sup>4</sup>, Theresa Schuck<sup>2</sup>, Virginia M.-Y. Lee<sup>2</sup>, and John Q. Trojanowski<sup>2</sup>

1: Institute of Neurology, Medical University of Vienna, Vienna, Austria; 2: Center for Neurodegenerative Disease Research (CNDP), Institute on Aging and Department of Pathology & Laboratory Medicine; 3: Department of Biostatistics and Epidemiology; 4: Department of Neurosurgery, Center for Brain Injury and Repair, the Perelman School of Medicine (PSOM) at the University of Pennsylvania, Philadelphia, PA, USA.

## SUPPLEMENTAL FILE 2

**Table 1.** Pairwise conditional probability matrix and odds ratios (and 95% confidence intervals) of **subpial ARTAG** in three major areas. Reading conditional probability plot from left to right shows the estimated probability that the region on the left shows subpial ARTAG before the region on the right. Reading the plot from top to bottom shows the estimated probability that the region below shows subpial ARTAG before the region above. Odds ratios are calculated using binary logistic regression analysis corrected for age and sex. For both conditional probability and odds ratios bold and underlined indicates significant values ( $p < 0.01$ ) and italics a p value under 0.05. - : no p value was generated. BBR: basal brain regions, LOB: lobar, BST: brainstem.

|                       | Region | Frequency | n   | Conditional probability |                    |                    | Odds ratio |                         |                                 |
|-----------------------|--------|-----------|-----|-------------------------|--------------------|--------------------|------------|-------------------------|---------------------------------|
|                       |        |           |     | LOB                     |                    |                    | LOB        |                         |                                 |
| PART                  | LOB    | 28        | 7   | LOB                     | <b><u>0.60</u></b> | 0.16               | LOB        | 0.67 (0.02-16.3)        | 11.7 (0.89-152.7)               |
|                       | BBR    | 80        | 20  | <b><u>0.88</u></b>      | BBR                | <b><u>0.83</u></b> | -          | BBR                     | 0.53 (0.04-6.22)                |
|                       | BST    | 28        | 7   | 0.40                    | <b><u>0.28</u></b> | BST                | -          | -                       | BST                             |
| AD                    | LOB    | 20.4      | 19  | LOB                     | <b><u>0.29</u></b> | 0.12               | LOB        | 0.54 (0.16-1.78)        | <b><u>6.60 (2.14-20.35)</u></b> |
|                       | BBR    | 81.7      | 76  | <b><u>0.83</u></b>      | BBR                | <b><u>0.80</u></b> | -          | BBR                     | 1.43 (0.36-5.61)                |
|                       | BST    | 22.6      | 21  | 0.17                    | <b><u>0.14</u></b> | BST                | -          | -                       | BST                             |
| PART/<br>AD/<br>other | LOB    | 19        | 34  | LOB                     | <b><u>0.32</u></b> | 0.12               | LOB        | <i>0.42 (0.17-0.99)</i> | <b><u>6.32 (2.74-14.56)</u></b> |
|                       | BBR    | 81        | 145 | <b><u>0.84</u></b>      | BBR                | <b><u>0.80</u></b> | -          | BBR                     | 1.05 (0.41-2.67)                |
|                       | BST    | 21.2      | 38  | 0.14                    | <b><u>0.20</u></b> | BST                | -          | -                       | BST                             |
| CBD                   | LOB    | 87.9      | 29  | LOB                     | 1.0                | <b><u>0.84</u></b> | LOB        | 0                       | -                               |
|                       | BBR    | 72.7      | 24  | 1.0                     | BBR                | <b><u>0.72</u></b> | -          | BBR                     | 0.95 (0.13-6.63)                |
|                       | BST    | 24.2      | 8   | <b><u>0</u></b>         | <b><u>0.22</u></b> | BST                | -          | -                       | BST                             |
| PSP                   | LOB    | 43.8      | 21  | LOB                     | 0.55               | 0.44               | LOB        | 0.46 (0.13-1.5)         | 0.87 (0.21-3.48)                |
|                       | BBR    | 62.5      | 30  | 0.70                    | BBR                | <b><u>0.61</u></b> | -          | BBR                     | 1.54 (0.36-6.51)                |
|                       | BST    | 25        | 12  | 0.25                    | <b><u>0.22</u></b> | BST                | -          | -                       | BST                             |
| PiD                   | LOB    | 66.7      | 2   | LOB                     | 0.50               | 0.50               | LOB        | -                       | -                               |
|                       | BBR    | 33        | 1   | 0                       | BBR                | 0                  | -          | BBR                     | -                               |
|                       | BST    | 33        | 1   | 0                       | 0                  | BST                | -          | -                       | BST                             |

**Table 2.** Pairwise conditional probability matrix and odds ratios (and 95% confidence intervals) of **subpial ARTAG** in five lobar areas. Odds ratios are calculated using binary logistic regression analysis corrected for age and sex. For both conditional probability and odds ratios bold and underlined indicates significant values (p<0.01) and italics a p value under 0.05. \* indicates that no p=0.013; -: no p value was generated; FR: frontal, CI: cingular, PA: parietal, TE: temporal, OCC: occipital.

| Disease       | Region | Frequency | n  | Conditional probability |                    |                     |                    |                    | Odds ratio |                  |                           |                         |                   |
|---------------|--------|-----------|----|-------------------------|--------------------|---------------------|--------------------|--------------------|------------|------------------|---------------------------|-------------------------|-------------------|
| PART          | FR     | 57.1      | 4  | FR                      | 1.0                | 0.75                | 0.75               | 1.0                | FR         | 0                | 0.53 (0.01-17.62)         | 0.007 (0.001-5.06)      | -                 |
|               | CI     | 14.3      | 1  | 1.0                     | CI                 | 1.0                 | 0                  | 1.0                | -          | CI               | 0                         | >1000                   | -                 |
|               | PA     | 28.6      | 2  | 0.5                     | 1.0                | PA                  | 0.5                | 1.0                | -          | -                | PA                        | 0.97 (0.02-33.81)       | -                 |
|               | TE     | 42.9      | 3  | 0.66                    | 0.66               | 0.66                | TE                 | 1.0                | -          | -                | -                         | TE                      | -                 |
|               | OCC    | 0         | 0  | 0                       | 0                  | 0                   | 0                  | OCC                | -          | -                | -                         | -                       | OCC               |
| AD            | FR     | 42.1      | 8  | FR                      | 1.0                | 0.87                | 0.85               | 1.0                | FR         | -                | 0.05 (0.003-1.10)         | 0.11 (0.009-1.32)       | -                 |
|               | CI     | 0         | 0  | 0                       | CI                 | 0.63                | 0.55               | 1.0                | -          | CI               | -                         | 0                       | -                 |
|               | PA     | 36.8      | 7  | 0.85                    | 1.0                | PA                  | 0.57               | 1.0                | -          | -                | PA                        | 1.07 (0.14-7.93)        | -                 |
|               | TE     | 42.1      | 8  | 0.87                    | 1.0                | 0.62                | TE                 | 1.0                | -          | -                | -                         | TE                      | -                 |
|               | OCC    | 21.1      | 4  | 0                       | 0                  | 0                   | 0                  | OCC                | -          | -                | -                         | -                       | OCC               |
| AD/PART/other | FR     | 41.2      | 14 | FR                      | <b><u>1.0</u></b>  | 0.87                | 0.84               | 1.0                | FR         | 0                | <i>0.16 (0.02-0.97)</i>   | <i>0.13 (0.02-0.83)</i> | -                 |
|               | CI     | 5.9       | 2  | <b><u>1.0</u></b>       | CI                 | <b><u>1.0</u></b>   | <b><u>0.5</u></b>  | 1.0                | -          | CI               | 0                         | 1.65 (0.08-32.2)        | -                 |
|               | PA     | 35.3      | 12 | 0.83                    | <b><u>1.0</u></b>  | PA                  | 0.63               | 1.0                | -          | -                | PA                        | 0.75 (0.15-3.59)        | -                 |
|               | TE     | 38.2      | 13 | 0.84                    | <b><u>0.92</u></b> | 0.69                | TE                 | 1.0                | -          | -                | -                         | TE                      | -                 |
|               | OCC    | 23.5      | 8  | 0                       | 0                  | 0                   | 0                  | OCC                | -          | -                | -                         | -                       | +                 |
| CBD           | FR     | 72.7      | 24 | FR                      | 0.36               | 0.08                | 0.45               | <b><u>0.66</u></b> | FR         | 2.01 (0.35-11.5) | <i>10.49 (1.01-108.8)</i> | 1.03 (0.19-5.37)        | -                 |
|               | CI     | 51.5      | 17 | 0.25                    | CI                 | 0.11                | 0.41               | <b><u>0.76</u></b> | -          | CI               | 2.94 (0.37-22.97)         | 2.7 (0.54-13.49)        | -                 |
|               | PA     | 81.8      | 27 | 0.19                    | 0.31               | PA                  | 0.48               | <b><u>0.7</u></b>  | -          | -                | PA                        | 0.29 (0.02-3.11)        | -                 |
|               | TE     | 54.5      | 18 | 0.23                    | 0.28               | 0.22                | TE                 | <b><u>0.61</u></b> | -          | -                | -                         | TE                      | 8.27 (0.86-79.05) |
|               | OCC    | 24.2      | 8  | <b><u>0</u></b>         | <b><u>0</u></b>    | <b><u>0</u></b>     | <b><u>0.12</u></b> | OCC                | -          | -                | -                         | -                       | OCC               |
| PSP           | FR     | 75        | 18 | FR                      | <b><u>0.88</u></b> | <b><u>0.66*</u></b> | <b><u>0.72</u></b> | <b><u>0.94</u></b> | FR         | 0.63 (0.04-8.56) | 0.99 (0.13-7.05)          | 0.77 (0.10-5.64)        | 0.29 (0.01-5.74)  |
|               | CI     | 12.5      | 3  | <b><u>0.33</u></b>      | CI                 | 0.66                | 0.66               | 1.0                | -          | CI               | 1.0 (0.07-13.2)           | 1.24 (0.09-16.47)       | 0                 |
|               | PA     | 33.3      | 8  | <b><u>0.25*</u></b>     | 0.87               | PA                  | 0.75               | 1.0                | -          | -                | PA                        | 0.73 (0.1-5.01)         | 0                 |
|               | TE     | 29.2      | 7  | <b><u>0.28</u></b>      | 0.85               | 0.71                | TE                 | 1.0                | -          | -                | -                         | TE                      | 0                 |
|               | OCC    | 8.3       | 2  | <b><u>0.5</u></b>       | 1.0                | 1.0                 | 1.0                | OCC                | -          | -                | -                         | -                       | OCC               |
| PiD           | FR     | 100       | 3  | FR                      | 0.66               | 0.66                | 1.0                | 1.0                | FR         | 0                | -                         | -                       | -                 |
|               | CI     | 33.3      | 1  | 1.0                     | CI                 | 0                   | 1.0                | 1.0                | -          | CI               | -                         | -                       | -                 |
|               | PA     | 33.3      | 1  | 1.0                     | 0                  | PA                  | 1.0                | 1.0                | -          | -                | PA                        | -                       | -                 |
|               | TE     | 33.3      | 1  | 0                       | 0                  | 0                   | TE                 | 1.0                | -          | -                | -                         | TE                      | -                 |
|               | OCC    | 33.3      | 1  | 0                       | 0                  | 0                   | 0                  | OCC                | -          | -                | -                         | -                       | OCC               |

**Table 3.** Pairwise conditional probability matrix and odds ratios (and 95% confidence intervals) generated by binary logistic regression (here without corrections for other variables) of **subependymal ARTAG** in three major areas. For both conditional probability and odds ratios bold and underlined indicates significant values ( $p < 0.01$ ) and italics a p value under 0.05. - : no p value was generated. BBR: basal brain regions, LOB: lobar, BST: brainstem.

|               | Region | Frequency | n  | Conditional probability |             |             | Odds ratio |                         |                  |
|---------------|--------|-----------|----|-------------------------|-------------|-------------|------------|-------------------------|------------------|
|               |        |           |    | MTL                     | SC          | BST         | MTL        | SC                      | BST              |
| PART          | MTL    | 87.5      | 7  | MTL                     | 1.0         | <u>0.85</u> | MTL        | -                       | -                |
|               | SC     | 12.5      | 1  | 0                       | SC          | 0.14        |            | SC                      | -                |
|               | BST    | 11.1      | 1  | 0                       | 0.14        | BST         |            |                         | BST              |
| AD            | MTL    | 81.8      | 27 | MTL                     | <b>0.83</b> | <b>0.82</b> | MTL        | <i>0.88 (0.11-6.89)</i> | 0.63 (0.05-7.63) |
|               | SC     | 27.3      | 9  | <b>0.33</b>             | SC          | 0.28        |            | SC                      | 0.83 (0.07-9.49) |
|               | BST    | 12.5      | 4  | <b>0.16</b>             | 0.13        | BST         |            |                         | BST              |
| AD/PART/other | MTL    | 81.5      | 53 | MTL                     | <b>0.88</b> | <b>0.82</b> | MTL        | <i>0.24 (0.06-0.98)</i> | 0.44 (0.07-2.84) |
|               | SC     | 23.1      | 15 | <b>0.45</b>             | SC          | 0.24        |            | SC                      | 0.57 (0.06-5.46) |
|               | BST    | 9.4       | 6  | <b>0.16</b>             | 0.10        | BST         |            |                         | BST              |
| CBD           | MTL    | 90.9      | 10 | MTL                     | 1.0         | 0.90        | MTL        | 0                       | -                |
|               | SC     | 40        | 4  | 1.0                     | SC          | 0.4         |            | SC                      | -                |
|               | BST    | 0         | 0  | 0                       | 0           | BST         |            |                         | BST              |
| PSP           | MTL    | 70        | 14 | MTL                     | <u>0.71</u> | <b>0.73</b> | MTL        | -                       | 0                |
|               | SC     | 22.2      | 4  | <u>0.33</u>             | SC          | 0.23        |            | SC                      | 0                |
|               | BST    | 5         | 1  | <b>0.16</b>             | 0.07        | BST         |            |                         | BST              |
| PiD           | MTL    | 100       | 1  | MTL                     | -           | -           | MTL        | -                       | -                |
|               | SC     | 100       | 1  | -                       | SC          | -           |            | SC                      | -                |
|               | BST    | 100       | 1  | -                       | -           | BST         |            |                         | BST              |

**Table 4.** Pairwise conditional probability matrix and odds ratios (and 95% confidence intervals) of **white matter ARTAG** in three major areas. Odds ratios are calculated using binary logistic regression analysis. Correction for age and sex and Braak stage of neurofibrillary degeneration does not change the results. For both conditional probability and odds ratios bold and underlined indicates significant values (p<0.01) and italics a p value under 0.05. - : no p value was generated. MTL: medial temporal lobe, LOB: lobar, BST: brainstem.

|                    | Region | Frequency | n   | Conditional probability |                    |                    | Odds ratio |                                |                  |
|--------------------|--------|-----------|-----|-------------------------|--------------------|--------------------|------------|--------------------------------|------------------|
|                    |        |           |     |                         |                    |                    |            |                                |                  |
| PART               | LOB    | 12.5      | 2   | LOB                     | <b><u>0.33</u></b> | 0.07               | LOB        | 0.16 (0.007-3.89)              | 13 (0.41-404)    |
|                    | MTL    | 81.3      | 13  | <b><u>0.85</u></b>      | MTL                | <b><u>0.78</u></b> | -          | MTL                            | >4000            |
|                    | BST    | 12.5      | 2   | 0.07                    | <b><u>0</u></b>    | BST                | -          | -                              | BST              |
| AD                 | LOB    | 48.7      | 55  | LOB                     | <b><u>0.64</u></b> | <b><u>0.5</u></b>  | LOB        | <i>0.38 (0.16-0.89)</i>        | 0.88 (0.31-2.50) |
|                    | MTL    | 69        | 78  | <b><u>0.78</u></b>      | MTL                | <b><u>0.69</u></b> | -          | MTL                            | 1.07 (0.34-3.31) |
|                    | BST    | 15        | 17  | <b><u>0.16</u></b>      | <b><u>0.14</u></b> | BST                | -          | -                              | BST              |
| AD/ PART/<br>other | LOB    | 33.7      | 63  | LOB                     | <b><u>0.49</u></b> | <b><u>0.34</u></b> | LOB        | <b><u>0.38 (0.20-0.75)</u></b> | 0.84 (0.37-1.92) |
|                    | MTL    | 71.1      | 133 | <b><u>0.78</u></b>      | MTL                | <b><u>0.70</u></b> | -          | MTL                            | 1.26 (0.52-3.02) |
|                    | BST    | 17.1      | 32  | <b><u>0.18</u></b>      | <b><u>0.15</u></b> | BST                | -          | -                              | BST              |
| CBD                | LOB    | 42.9      | 9   | LOB                     | 0.60               | <b><u>0.40</u></b> | LOB        | 0.40 (0.05-3.12)               | >2400            |
|                    | MTL    | 76.2      | 16  | 0.85                    | MTL                | <b><u>0.75</u></b> | -          | MTL                            | >5000            |
|                    | BST    | 4.8       | 1   | <b><u>0</u></b>         | <b><u>0</u></b>    | BST                | -          | -                              | BST              |
| PSP                | LOB    | 23.8      | 10  | LOB                     | <b><u>0.50</u></b> | 0.25               | LOB        | 0.24 (0.40-1.46)               | 0.75 (0.07-7.61) |
|                    | MTL    | 85.7      | 36  | <b><u>0.90</u></b>      | MTL                | <b><u>0.86</u></b> | -          | MTL                            | 0.64 (0.05-7.01) |
|                    | BST    | 11.9      | 5   | 0.12                    | <b><u>0.16</u></b> | BST                | -          | -                              | BST              |
| PiD                | LOB    | 0         | 0   | LOB                     | 0                  | 0                  | LOB        | -                              | -                |
|                    | MTL    | 100       | 2   | 1.0                     | MTL                | 1.0                | -          | MTL                            | -                |
|                    | BST    | 50        | 1   | 0.5                     | 0.5                | BST                | -          | -                              | BST              |

**Table 5.** Pairwise conditional probability matrix and odds ratios (and 95% confidence intervals) of **white matter ARTAG** in five lobar areas in Alzheimer diseased cases. Odds ratios are calculated using binary logistic regression analysis. Correction for age and sex and Braak stage of neurofibrillary degeneration does not change the results. Bold and underlined indicates significant values ( $p < 0.01$ ). FR: frontal, CI: cingular, PA: parietal, TE: temporal, OCC: occipital.

|                 |                    |                    |                 |                    |
|-----------------|--------------------|--------------------|-----------------|--------------------|
| FR              | 0.37               | 0.29               | 0.39            | <b><u>0.35</u></b> |
| 0.29            | CI                 | 0.37               | 0.32            | <b><u>0.31</u></b> |
| 0.38            | 0.52               | PA                 | 0.64            | <b><u>0.50</u></b> |
| 0.54            | 0.51               | 0.65               | TE              | <b><u>0.51</u></b> |
| <b><u>0</u></b> | <b><u>0.03</u></b> | <b><u>0.04</u></b> | <b><u>0</u></b> | OCC                |

|    |                  |                   |                  |                   |
|----|------------------|-------------------|------------------|-------------------|
| FR | 1.69 (0.53-5.34) | 2.77 (0.89-8.57)  | 1.09 (.35-3.35)  | >2000             |
| -  | CI               | 0.805 (0.26-2.45) | 1.29 (0.42-4.00) | 4.28 (0.35-51.32) |
| -  | -                | PA                | 0.39 (0.13-1.19) | 2.00 (0.16-23.69) |
| -  | -                | -                 | TE               | >1500             |
| -  | -                | -                 | -                | OCC               |

**Table 6.** Pairwise conditional probability matrix and odds ratios (and 95% confidence intervals) of **gray matter ARTAG** in four major anatomical areas. Odds ratios are calculated using binary logistic regression analysis. Correction for age and sex and Braak stage of neurofibrillary degeneration and presence of grains in the medial temporal lobe does not change the results. For both conditional probability and odds ratios bold and underlined indicates significant values (p<0.01) and italics a p value under 0.05. - : no p value was generated.

MTL: medial temporal lobe, LOB: lobar, SC: Subcortical, BST: brainstem.

\* correction only for MTL grains does not change significance but correction for all four variables (age, sex, Braak stage, grains) associates with p=0.5; §: significance lost after corrections; §§ remains significant after correct for sex, and for sex and age but p= 0.06 after additional correction for Braak stage of neurofibrillary degeneration.

|                    | Region | Frequency | n   | Conditional probability |             |             |             | Odds ratio |                          |                            |                           |
|--------------------|--------|-----------|-----|-------------------------|-------------|-------------|-------------|------------|--------------------------|----------------------------|---------------------------|
| PART               | MTL    | 77.4      | 24  | MTL                     | <b>0.66</b> | <b>0.77</b> | <b>0.87</b> | MTL        | -                        | 1.02 (0.16-6.62)           | <i>0.10 (0.01-0.73)§</i>  |
|                    | LOB    | 32.3      | 10  | <b>0</b>                | LOB         | 0.18        | 0.29        | -          | LOB                      | <i>9.00 (1.55-52.26)§§</i> | 1.82 (0.32-10.34)         |
|                    | SC     | 29.0      | 9   | <b>0.28</b>             | 0.14        | SC          | 0.22        | -          | -                        | SC                         | 0.97 (0.15-6.24)          |
|                    | BST    | 22.6      | 7   | <b>0.57</b>             | 0.19        | 0.29        | BST         | -          | -                        | -                          | BST                       |
| AD                 | MTL    | 50.0      | 32  | MTL                     | 0.41        | 0.69        | <i>0.56</i> | MTL        | <i>3.02 (1.01-9.00)</i>  | <i>0.27 (0.09-0.78)§</i>   | 0.44 (0.14-1.34)          |
|                    | LOB    | 34.4      | 22  | 0.22                    | LOB         | <b>0.23</b> | 0.40        | -          | LOB                      | 2.42 (0.79-7.40)           | 0.40 (.11-1.40)           |
|                    | SC     | 59.4      | 38  | 0.74                    | <b>0.52</b> | SC          | <b>0.57</b> | -          | -                        | SC                         | 1.25 (0.41-3.77)          |
|                    | BST    | 29.7      | 19  | <i>0.38</i>             | 0.35        | <b>0.26</b> | BST         | -          | -                        | -                          | BST                       |
| AD/ PART/<br>other | MTL    | 71.0      | 115 | MTL                     | <b>0.68</b> | <b>0.81</b> | <b>0.79</b> | MTL        | 1.63 (0.74-3.56)         | <b>0.27 (0.13-0.55)*</b>   | <b>0.16 (0.07-0.38)</b>   |
|                    | LOB    | 30.9      | 50  | <b>0.23</b>             | LOB         | 0.21        | <i>0.31</i> | -          | LOB                      | <b>3.64 (1.80-7.33)</b>    | 0.88 (0.37-2.09)          |
|                    | SC     | 35.2      | 57  | <b>0.56</b>             | 0.25        | SC          | <b>0.32</b> | -          | -                        | SC                         | 1.96 (0.88-4.34)          |
|                    | BST    | 19.1      | 31  | <b>0.41</b>             | <i>0.19</i> | <b>0.15</b> | BST         | -          | -                        | -                          | BST                       |
| CBD                | MTL    | 92.5      | 37  | MTL                     | 1.0         | 1.0         | <b>0.91</b> | MTL        | 0                        | 0                          | -                         |
|                    | LOB    | 95.0      | 38  | 1.0                     | LOB         | 1.0         | <b>0.94</b> | -          | LOB                      | -                          | -                         |
|                    | SC     | 92.5      | 37  | 1.0                     | 1.0         | SC          | <b>0.94</b> | -          | -                        | SC                         | -                         |
|                    | BST    | 15.0      | 6   | <b>0</b>                | <b>0</b>    | <b>0</b>    | BST         | -          | -                        | -                          | BST                       |
| PSP                | MTL    | 80.6      | 75  | MTL                     | 0.50        | <b>0.80</b> | <b>0.72</b> | MTL        | <b>5.75 (1.58-20.82)</b> | 1.02 (0.10-9.81)           | 2.30 (0.81-6.56)          |
|                    | LOB    | 87.1      | 81  | 0.66                    | LOB         | 0.80        | <b>0.72</b> | -          | LOB                      | 1.72 (0.1716.89)           | <b>10.38 (2.12-50.85)</b> |
|                    | SC     | 93.5      | 87  | <b>0.94</b>             | 0.97        | SC          | <b>0.88</b> | -          | -                        | SC                         | 7.09 (0.75-66.33)         |
|                    | BST    | 60.2      | 56  | <b>0.44</b>             | <b>0.16</b> | <b>0.20</b> | BST         | -          | -                        | -                          | BST                       |
| PiD                | MTL    | 25.0      | 4   | MTL                     | <i>0.25</i> | 0.16        | 0.16        | MTL        | 1.12 (0.08-15.50)        | 2.50 (0.19-32.19)          | 10.00 (0.58-171.20)       |
|                    | LOB    | 75.0      | 12  | <i>0.72</i>             | LOB         | 0.83        | <b>0.76</b> | -          | LOB                      | 0.40 (0.03-5.15)           | 0.60 (0.03-9.15)          |
|                    | SC     | 56.3      | 9   | 0.54                    | 0.75        | SC          | 0.58        | -          | -                        | SC                         | 1.42 (0.1-20.43)          |
|                    | BST    | 18.8      | 3   | 0.09                    | <b>0.25</b> | 0.16        | BST         | -          | -                        | -                          | BST                       |
