# Supplementary material for: Sequential stages and distribution patterns of aging-related tau astrogliopathy (ARTAG) in the human brain
Source: Springer Nature journal article supplement (doi:10.1186/s40478-018-0552-y), 2018-06-11
Supplement: MOESM3 [file 25666420]

## Sequential stages and distribution patterns of aging-related tau astrogliopathy (ARTAG) in the human brain

Gabor G. Kovacs<sup>1,2</sup>, Sharon X. Xie<sup>3</sup>, John L. Robinson<sup>2</sup>, Edward B. Lee<sup>2</sup>, Douglas H. Smith<sup>4</sup>, Theresa Schuck<sup>2</sup>, Virginia M.-Y. Lee<sup>2</sup>, and John Q. Trojanowski<sup>2</sup>

1: Institute of Neurology, Medical University of Vienna, Vienna, Austria; 2: Center for Neurodegenerative Disease Research (CNDR), Institute on Aging and Department of Pathology & Laboratory Medicine; 3: Department of Biostatistics and Epidemiology; 4: Department of Neurosurgery, Center for Brain Injury and Repair, the Perelman School of Medicine (PSOM) at the University of Pennsylvania, Philadelphia, PA, USA.

### SUPPLEMENTAL FILE 3

**Table 1.** Pairwise conditional probability matrix of **gray matter ARTAG** in nine major areas. Bold and underlined indicates significant values ( $p < 0.01$ ) and italics a p value under 0.05.

|     |                   | Frequency |    | n                  |                    |                    |                    |                    |                    |                    |                    |                    |
|-----|-------------------|-----------|----|--------------------|--------------------|--------------------|--------------------|--------------------|--------------------|--------------------|--------------------|--------------------|
| CBD | Frontal           | 95        | 38 | Frontal            | 0                  | 0.75               | <b><u>0.94</u></b> | <b><u>1.0</u></b>  | 1.0                | <b><u>1.0</u></b>  | <b><u>0.97</u></b> | <b><u>0.93</u></b> |
|     | Parietal          | 95        | 38 | 0                  | Parietal           | 0.75               | <b><u>0.94</u></b> | <b><u>1.0</u></b>  | 1.0                | <b><u>1.0</u></b>  | <b><u>0.97</u></b> | <b><u>0.97</u></b> |
|     | Temporal          | 90        | 36 | 0                  | 0                  | Temporal           | <b><u>0.89</u></b> | <b><u>0.88</u></b> | 1.0                | <b><u>0.93</u></b> | <b><u>0.88</u></b> | <b><u>0.87</u></b> |
|     | Occipital         | 52.5      | 21 | <b><u>0</u></b>    | <b><u>0</u></b>    | <b><u>0.50</u></b> | Occipital          | 0.57               | <b><u>0.50</u></b> | <b><u>0.53</u></b> | <b><u>0.48</u></b> | <b><u>0.48</u></b> |
|     | Amygdala          | 35        | 14 | <b><u>1.0</u></b>  | <b><u>0</u></b>    | <b><u>0.25</u></b> | 0.42               | Amygdala           | <b><u>0.50</u></b> | <i>0.26</i>        | <b><u>0.34</u></b> | <i>0.30</i>        |
|     | Striatum          | 92.5      | 37 | 1.0                | 1.0                | 1.0                | <b><u>0.94</u></b> | <b><u>0.96</u></b> | Striatum           | <b><u>0.96</u></b> | <b><u>0.97</u></b> | <b><u>0.97</u></b> |
|     | Substantia nigra  | 15        | 6  | <b><u>1.0</u></b>  | <b><u>1.0</u></b>  | <b><u>0.33</u></b> | <b><u>0.17</u></b> | <i>0.04</i>        | <b><u>0</u></b>    | Sub nigra          | 0.15               | 0.12               |
|     | Pons              | 2.5       | 1  | <b><u>0</u></b>    | <b><u>0</u></b>    | <b><u>0</u></b>    | <b><u>0.05</u></b> | <b><u>0</u></b>    | <b><u>0</u></b>    | 0                  | Pons               | 0                  |
|     | Medulla oblongata | 5         | 2  | <b><u>0</u></b>    | <b><u>0</u></b>    | <b><u>0</u></b>    | <b><u>0</u></b>    | <i>0.04</i>        | <b><u>0</u></b>    | 0.06               | 0.05               | Med.Obl            |
|     |                   | Frequency |    | n                  |                    |                    |                    |                    |                    |                    |                    |                    |
| PSP | Frontal           | 81.7      | 76 | Frontal            | 0.42               | <b><u>0.58</u></b> | <b><u>0.63</u></b> | <b><u>0.81</u></b> | <i>0.80</i>        | <b><u>0.81</u></b> | <b><u>0.81</u></b> | <b><u>0.80</u></b> |
|     | Parietal          | 73.1      | 68 | 0.21               | Parietal           | <i>0.42</i>        | <b><u>0.52</u></b> | <b><u>0.78</u></b> | <b><u>0.60</u></b> | <b><u>0.76</u></b> | <b><u>0.78</u></b> | <b><u>0.76</u></b> |
|     | Temporal          | 67.7      | 63 | <b><u>0.20</u></b> | <i>0.15</i>        | Temporal           | 0.43               | <b><u>0.66</u></b> | <b><u>0.60</u></b> | <b><u>0.66</u></b> | <b><u>0.69</u></b> | <b><u>0.67</u></b> |
|     | Occipital         | 55.9      | 52 | <b><u>0.12</u></b> | <b><u>0.15</u></b> | 0.25               | Occipital          | <b><u>0.61</u></b> | <b><u>0.50</u></b> | <b><u>0.55</u></b> | <b><u>0.57</u></b> | <b><u>0.55</u></b> |
|     | Amygdala          | 30.1      | 28 | <b><u>0.26</u></b> | <b><u>0.36</u></b> | <b><u>0.28</u></b> | <b><u>0.34</u></b> | Amygdala           | <b><u>0.20</u></b> | <b><u>0.24</u></b> | <b><u>0.31</u></b> | <b><u>0.30</u></b> |
|     | Striatum          | 93.5      | 87 | <i>0.93</i>        | <b><u>0.89</u></b> | <b><u>0.92</u></b> | <b><u>0.94</u></b> | <b><u>0.93</u></b> | Striatum           | <b><u>0.95</u></b> | <b><u>0.94</u></b> | <b><u>0.95</u></b> |
|     | Substantia nigra  | 12.9      | 12 | <b><u>0.06</u></b> | <b><u>0.05</u></b> | <b><u>0.06</u></b> | <b><u>0.07</u></b> | <b><u>0.04</u></b> | <b><u>0.20</u></b> | Sub nigra          | <b><u>0.12</u></b> | 0.09               |
|     | Pons              | 2.2       | 2  | <b><u>0</u></b>    | <b><u>0</u></b>    | <b><u>0.03</u></b> | <b><u>0.02</u></b> | <b><u>0</u></b>    | <b><u>0</u></b>    | <b><u>0.01</u></b> | Pons               | 0.01               |
|     | Medulla oblongata | 6.5       | 6  | <b><u>0</u></b>    | <b><u>0</u></b>    | <b><u>0.06</u></b> | <b><u>0.02</u></b> | <b><u>0.05</u></b> | <b><u>0</u></b>    | 0.02               | 0.04               | Med.Obl            |

|               |                   | Frequency n |    |             |             |             |             |             |             |             |             |             |
|---------------|-------------------|-------------|----|-------------|-------------|-------------|-------------|-------------|-------------|-------------|-------------|-------------|
| PiD           | Frontal           | 31.3        | 5  | Frontal     | 0.20        | 0.16        | 0.25        | 0.44        | 0.33        | 0.30        | 0.35        | 0.25        |
|               | Parietal          | 56.3        | 9  | 0.55        | Parietal    | 0.60        | 0.57        | 0.66        | 0.66        | <u>0.66</u> | <u>0.69</u> | <b>0.72</b> |
|               | Temporal          | 56.3        | 9  | 0.50        | 0.60        | Temporal    | 0.50        | 0.62        | 0.33        | <u>0.50</u> | <u>0.53</u> | 0.45        |
|               | Occipital         | 50          | 8  | 0.45        | 0.40        | 0.33        | Occipital   | 0.55        | 0.50        | 0.46        | 0.50        | 0.41        |
|               | Amygdala          | 43.8        | 7  | 0.54        | 0.40        | 0.50        | 0.50        | Amygdala    | 0.50        | 0.30        | 0.35        | 0.3         |
|               | Striatum          | 56.3        | 9  | 0.60        | 0.60        | 0.33        | 0.62        | 0.66        | Striatum    | <u>0.53</u> | <b>0.57</b> | <u>0.58</u> |
|               | Substantia nigra  | 18.8        | 3  | 0.18        | <u>0.20</u> | <u>0</u>    | 0.12        | 0           | <u>0</u>    | Sub nigra   | 0.07        | 0.08        |
|               | Pons              | 12.5        | 2  | 0.18        | <u>0.20</u> | <u>0</u>    | 0.12        | 0           | <b>0</b>    | 0           | Pons        | 0.08        |
|               | Medulla oblongata | 12.5        | 2  | 0.10        | <b>0</b>    | 0           | 0           | 0           | <u>0</u>    | 0           | 0.08        | Med.Obl     |
| AD+PART+Other | Frontal           | 13.6        | 22 | Frontal     | 0.08        | 0.08        | <b>0.12</b> | <b>0.14</b> | <b>0.07</b> | 0.12        | <u>0.13</u> | 0.14        |
|               | Parietal          | 13.6        | 22 | 0.07        | Parietal    | 0.03        | <b>0.10</b> | <b>0.13</b> | <b>0.05</b> | 0.13        | 0.13        | 0.13        |
|               | Temporal          | 17.3        | 28 | 0.11        | 0.08        | Temporal    | <b>0.17</b> | <b>0.18</b> | <b>0.06</b> | 0.18        | <b>0.17</b> | <u>0.17</u> |
|               | Occipital         | 1.9         | 3  | <b>0</b>    | <b>0</b>    | <b>0</b>    | Occipital   | <b>0.01</b> | <b>0</b>    | <b>0.02</b> | 0.01        | 0.02        |
|               | Amygdala          | 30.2        | 49 | <b>0.31</b> | <b>0.31</b> | <b>0.31</b> | <b>0.30</b> | Amygdala    | 0.30        | <b>0.26</b> | <b>0.26</b> | <b>0.26</b> |
|               | Striatum          | 35.2        | 57 | <b>0.29</b> | <b>0.29</b> | <b>0.29</b> | <b>0.36</b> | 0.34        | Striatum    | <b>0.36</b> | <b>0.33</b> | <b>0.34</b> |
|               | Substantia nigra  | 11.1        | 18 | 0.08        | 0.11        | 0.11        | <b>0.12</b> | <b>0.02</b> | <b>0.11</b> | Sub nigra   | <b>0.06</b> | 0.06        |
|               | Pons              | 4.9         | 8  | <u>0.04</u> | 0.06        | <b>0.06</b> | 0.04        | <b>0</b>    | <b>0.05</b> | <b>0</b>    | Pons        | 0.05        |
|               | Medulla oblongata | 8           | 13 | 0.08        | 0.09        | <u>0.08</u> | 0.07        | <b>0.02</b> | <b>0.08</b> | 0.04        | 0.02        | Med.Obl     |
| PART          | Frontal           | 9.7         | 3  | Frontal     | 0.03        | 0.04        | 0.09        | 0.14        | <u>0</u>    | 0.11        | 0.10        | 0.10        |
|               | Parietal          | 9.7         | 3  | 0.03        | Parietal    | 0.04        | 0.09        | 0.14        | 0.04        | 0.11        | 0.10        | 0.10        |
|               | Temporal          | 19.4        | 6  | 0.14        | 0.14        | Temporal    | 0.19        | 0.23        | 0.04        | 0.22        | 0.20        | 0.20        |
|               | Occipital         | 0           | 0  | 0           | 0           | 0           | Occipital   | 0           | 0           | 0           | 0           | 0           |
|               | Amygdala          | 29          | 9  | 0.33        | 0.33        | 0.33        | 0.30        | Amygdala    | 0.33        | <u>0.23</u> | 0.27        | <b>0.26</b> |
|               | Striatum          | 29          | 9  | <u>0.21</u> | 0.25        | 0.16        | 0.29        | 0.33        | Striatum    | 0.33        | 0.30        | <u>0.27</u> |
|               | Substantia nigra  | 9.7         | 3  | 0.11        | 0.11        | 0.12        | 0.10        | <u>0</u>    | 0.14        | Sub nigra   | 0.10        | 0.07        |
|               | Pons              | 3.2         | 1  | 0           | 0           | 0           | 0           | 0           | 0           | 0           | Pons        | 0           |
|               | Medulla oblongata | 3.2         | 1  | 0.03        | 0.03        | 0.04        | 0.03        | <b>0</b>    | <u>0.04</u> | 0           | 0.03        | Med.Obl     |

|    |                   |      |    |             |             |             |             |             |             |             |             |             |
|----|-------------------|------|----|-------------|-------------|-------------|-------------|-------------|-------------|-------------|-------------|-------------|
| AD | Frontal           | 18.8 | 12 | Frontal     | 0.12        | 0.12        | <u>0.14</u> | 0.20        | <b>0.16</b> | 0.17        | 0.20        | 0.18        |
|    | Parietal          | 17.2 | 11 | 0.08        | Parietal    | 0.05        | <u>0.13</u> | 0.16        | <b>0.03</b> | 0.18        | 0.18        | 0.19        |
|    | Temporal          | 20.3 | 13 | 0.12        | 0.09        | Temporal    | <b>0.17</b> | 0.20        | <b>0.03</b> | 0.21        | 0.20        | 0.19        |
|    | Occipital         | 3.1  | 2  | <u>0</u>    | <u>0</u>    | <b>0</b>    | Occipital   | <b>0.02</b> | <b>0</b>    | 0.04        | 0.04        | 0.04        |
|    | Amygdala          | 29.7 | 19 | 0.31        | 0.30        | 0.30        | <b>0.30</b> | Amygdala    | <b>0.28</b> | <b>0.24</b> | <b>0.23</b> | <b>0.25</b> |
|    | Striatum          | 59.4 | 38 | <b>0.58</b> | <b>0.52</b> | <b>0.51</b> | <b>0.58</b> | <b>0.58</b> | Striatum    | <b>0.60</b> | <b>0.57</b> | <b>0.58</b> |
|    | Substantia nigra  | 14.1 | 9  | 0.12        | 0.15        | 0.15        | 0.15        | <b>0.04</b> | <b>0.15</b> | Sub nigra   | 0.07        | 0.08        |
|    | Pons              | 7.8  | 5  | 0.09        | 0.10        | 0.10        | 0.08        | <b>0</b>    | <b>0.11</b> | 0           | Pons        | 0.05        |
|    | Medulla oblongata | 7.8  | 5  | 0.06        | 0.09        | 0.06        | 0.06        | <b>0</b>    | <b>0.07</b> | 0.03        | 0.03        | Med.Obl     |

**Table 2.** Odds ratios (and 95% confidence intervals) of **gray matter ARTAG** in nine areas in the pooled cohort of AD+PART+other diseases. Odds ratios are calculated using binary logistic regression analysis with correction for age and sex and Braak stage of neurofibrillary degeneration. - indicates that odds ratios were not generated.

|               |           |                             |                           |                          |                          |                          |                          |                  |   |
|---------------|-----------|-----------------------------|---------------------------|--------------------------|--------------------------|--------------------------|--------------------------|------------------|---|
| AD+PART+Other | Frontal   | <b>12.00 (4.17-34.49)</b>   | <b>10.53 (3.44-32.20)</b> | -                        | 0.89 (0.30-2.61)         | <u>3.61 (1.15-11.30)</u> | <u>3.55 (1.07-11.73)</u> | 0.75 (0.08-6.87) | - |
|               | Parietal  | <b>38.94 (12.06-125.75)</b> | -                         | 0.94 (0.34-2.64)         | <b>6.37 (2.32-17.44)</b> | 1.32 (0.34-5.02)         | 0                        | 0                |   |
|               | Temporal  | -                           | 0.91 (0.37-2.26)          | <b>8.31 (3.25-21.25)</b> | 0.88 (0.23-3.30)         | 0                        | 0.87 (0.18-4.18)         |                  |   |
|               | Occipital | 4.60 (0.40-52.58)           | -                         | 3.39 (0.28-39.91)        | 0                        | 0                        |                          |                  |   |
|               | Amygdala  | 1.55 (0.67-3.61)            | <b>14.26 (3.79-53.55)</b> | -                        | <b>9.28 (2.41-35.73)</b> |                          |                          |                  |   |
|               | Striatum  | 1.12 (0.40-3.07)            | 0.65 (0.12-3.35)          | 0.85 (0.24-2.91)         |                          |                          |                          |                  |   |
|               | Sub nigra | -                           | <b>16.46 (4.56-59.38)</b> |                          |                          |                          |                          |                  |   |
|               | Pons      | <b>31.66 (6.26-160.11)</b>  |                           |                          |                          |                          |                          |                  |   |
|               | Med.Obl   |                             |                           |                          |                          |                          |                          |                  |   |

**Table 3.** Pairwise conditional probability matrix of **gray matter ARTAG** in eight areas in cases where amygdala was not involved. Bold and underlined indicates significant values ( $p < 0.01$ ) and italics a p value under 0.05.

|               |                   | Frequency | n  |                    |                    |                    |                    |                    |                    |                    |                    |
|---------------|-------------------|-----------|----|--------------------|--------------------|--------------------|--------------------|--------------------|--------------------|--------------------|--------------------|
| AD+PART+Other | Frontal           |           | 15 | Frontal            | 0.09               | 0.08               | <b><u>0.13</u></b> | <b><u>0.07</u></b> | <b><u>0.14</u></b> | 0.14               | <b><u>0.16</u></b> |
|               | Parietal          |           | 14 | 0.08               | Parietal           | 0.03               | <b><u>0.11</u></b> | <b><u>0.05</u></b> | <b><u>0.12</u></b> | 0.11               | <i>0.13</i>        |
|               | Temporal          |           | 19 | 0.12               | 0.08               | Temporal           | <b><u>0.19</u></b> | <b><u>0.08</u></b> | <b><u>0.19</u></b> | <b><u>0.17</u></b> | <b><u>0.19</u></b> |
|               | Occipital         |           | 1  | <b><u>0</u></b>    | <b><u>0</u></b>    | <b><u>0</u></b>    | Occipital          | <b><u>0</u></b>    | 0.01               | 0.01               | 0.01               |
|               | Striatum          |           | 37 | <b><u>0.29</u></b> | <b><u>0.29</u></b> | <b><u>0.26</u></b> | <b><u>0.36</u></b> | Striatum           | <b><u>0.36</u></b> | 0.33               | <b><u>0.34</u></b> |
|               | Substantia nigra  |           | 3  | <b><u>0.01</u></b> | <b><u>0.02</u></b> | <b><u>0.03</u></b> | 0.04               | <b><u>0.03</u></b> | Sub nigra          | 0.03               | 0.03               |
|               | Pons              |           | 0  | 0                  | 0.06               | 0                  | 0                  | 0                  | 0                  | Pons               | 0                  |
|               | Medulla oblongata |           | 3  | <b><u>0.03</u></b> | <i>0.03</i>        | <b><u>0.03</u></b> | 0.02               | <b><u>0.02</u></b> | 0                  | 0.03               | Med.Obl            |

**Table 4.** Pairwise conditional probability matrix of **gray matter ARTAG** in eight areas in cases where striatum was not involved. Bold and underlined indicates significant values ( $p < 0.01$ ).

|               |                   | Frequency | n |                    |                    |                    |                    |                    |                    |                    |                    |
|---------------|-------------------|-----------|---|--------------------|--------------------|--------------------|--------------------|--------------------|--------------------|--------------------|--------------------|
| AD+PART+Other | Frontal           |           |   | Frontal            | 0.06               | 0.06               | 0.05               | <b><u>0.07</u></b> | 0.06               | 0.06               | 0.06               |
|               | Parietal          |           |   | 0.05               | Parietal           | 0.03               | 0.02               | <b><u>0.05</u></b> | 0.13               | 0.13               | 0.05               |
|               | Temporal          |           |   | 0.06               | 0.04               | Temporal           | 0.07               | <b><u>0.08</u></b> | 0.08               | 0.07               | 0.07               |
|               | Occipital         |           |   | 0                  | 0                  | 0                  | Occipital          | <b><u>0</u></b>    | 0                  | 0                  | 0                  |
|               | Amygdala          |           |   | <b><u>0.30</u></b> | <b><u>0.30</u></b> | <b><u>0.31</u></b> | <b><u>0.30</u></b> | Amygdala           | <b><u>0.25</u></b> | <b><u>0.25</u></b> | <b><u>0.25</u></b> |
|               | Substantia nigra  |           |   | 0.09               | 0.11               | 0.12               | 0.11               | <b><u>0.03</u></b> | Sub nigra          | 0.05               | 0.05               |
|               | Pons              |           |   | 0.04               | 0.06               | 0.06               | 0.04               | <b><u>0</u></b>    | 0                  | Pons               | 0.01               |
|               | Medulla oblongata |           |   | 0.07               | 0.09               | 0.09               | 0.10               | <b><u>0.02</u></b> | 0.03               | 0.04               | Med.Obl            |

**Table 5.** Pairwise conditional probability matrix of **primary FTL D-tauopathy associated astroglial tau immunoreactivities (tufted astrocytes, astrocytic plaques and ramified astrocytes)** in nine major areas. Bold and underlined indicates significant values ( $p < 0.01$ ) and italics a  $p$  value under 0.05.

| Frequency n |                   |      |     |                    |                    |                    |                    |                    |                 |                    |                    |                    |
|-------------|-------------------|------|-----|--------------------|--------------------|--------------------|--------------------|--------------------|-----------------|--------------------|--------------------|--------------------|
| CBD         | Frontal           | 91.3 | 42  | Frontal            | 0                  | 0                  | 1.0                | 1.0                | 1.0             | 1.0                | 1.0                | 1.0                |
|             | Parietal          | 93.5 | 43  | 0                  | Parietal           | 1.0                | <u><b>1.0</b></u>  | 1.0                | 1.0             | 1.0                | 1.0                | 1.0                |
|             | Temporal          | 89.1 | 41  | 0                  | 0.97               | Temporal           | <u><b>0.95</b></u> | 0.83               | 1.0             | <u><b>0.97</b></u> | 1.0                | 0.97               |
|             | Occipital         | 41.3 | 19  | 0                  | <u><b>0</b></u>    | <u><b>0</b></u>    | Occipital          | <u><b>0.40</b></u> | <u><b>0</b></u> | <u><b>0.48</b></u> | 0.47               | 0.50               |
|             | Amygdala          | 82.6 | 38  | 0                  | 0                  | 0                  | <u><b>0.86</b></u> | Amygdala           | 1.0             | <u><b>1.0</b></u>  | 0.87               | 0.85               |
|             | Striatum          | 89.1 | 41  | 0                  | 0                  | 1.0                | <u><b>0.95</b></u> | 1.0                | Striatum        | <u><b>0.97</b></u> | 0.97               | 0.97               |
|             | Substantia nigra  | 2.2  | 1   | 0                  | 0                  | <u><b>0</b></u>    | <u><b>0.05</b></u> | <u><b>0</b></u>    | <u><b>0</b></u> | Sub nigra          | 0.02               | 0.02               |
|             | Pons              | 0    | 0   | 0                  | 0                  | 0                  | 0                  | 0                  | 0               | 0                  | Pons               | 0                  |
|             | Medulla oblongata | 0    | 0   | 0                  | 0                  | 0                  | 0                  | 0                  | 0               | 0                  | 0                  | Med Obl            |
| Frequency n |                   |      |     |                    |                    |                    |                    |                    |                 |                    |                    |                    |
| PSP         | Frontal           | 75.2 | 82  | Frontal            | 0.35               | <u><b>0.46</b></u> | <u><b>0.62</b></u> | <u><b>0.60</b></u> | <u><b>0</b></u> | <u><b>0.72</b></u> | <u><b>0.73</b></u> | <u><b>0.73</b></u> |
|             | Parietal          | 67   | 73  | 0.14               | Parietal           | <u><b>0.36</b></u> | <u><b>0.55</b></u> | <u><b>0.53</b></u> | <u><b>0</b></u> | <u><b>0.66</b></u> | <u><b>0.66</b></u> | <u><b>0.65</b></u> |
|             | Temporal          | 58.7 | 64  | <u><b>0</b></u>    | <u><b>0.10</b></u> | Temporal           | <i>0.44</i>        | 0.43               | <u><b>0</b></u> | <u><b>0.55</b></u> | <u><b>0.55</b></u> | <u><b>0.55</b></u> |
|             | Occipital         | 41.3 | 45  | <u><b>0.05</b></u> | <u><b>0.14</b></u> | <i>0.20</i>        | Occipital          | 0.41               | <u><b>0</b></u> | <i>0.72</i>        | <u><b>0.47</b></u> | <u><b>0.47</b></u> |
|             | Amygdala          | 51.4 | 56  | <u><b>0.13</b></u> | <u><b>0.21</b></u> | 0.34               | 0.45               | Amygdala           | <u><b>0</b></u> | <u><b>1.0</b></u>  | <u><b>0.48</b></u> | <u><b>0.47</b></u> |
|             | Striatum          | 94.5 | 103 | <u><b>0.78</b></u> | <u><b>0.82</b></u> | <u><b>0.88</b></u> | <u><b>0.93</b></u> | <u><b>0.90</b></u> | Striatum        | <u><b>0.92</b></u> | <u><b>0.94</b></u> | <u><b>0.94</b></u> |
|             | Substantia nigra  | 30.3 | 33  | <u><b>0.13</b></u> | <u><b>0.21</b></u> | <u><b>0.22</b></u> | <i>0.38</i>        | <u><b>0.25</b></u> | <u><b>0</b></u> | Sub nigra          | <u><b>0.22</b></u> | <u><b>0.28</b></u> |
|             | Pons              | 14.7 | 16  | <u><b>0.04</b></u> | <u><b>0.06</b></u> | <u><b>0.09</b></u> | <u><b>0.11</b></u> | <u><b>0.10</b></u> | <u><b>0</b></u> | <u><b>0.05</b></u> | Pons               | 0.11               |
|             | Medulla oblongata | 11   | 12  | <u><b>0.04</b></u> | <u><b>0.03</b></u> | <u><b>0.05</b></u> | <u><b>0.10</b></u> | <u><b>0.06</b></u> | <u><b>0</b></u> | <u><b>0.09</b></u> | 0.07               | Med Obl            |

|     |                   | Frequency | n  |          |          |                    |                    |                    |                    |                    |                    |         |
|-----|-------------------|-----------|----|----------|----------|--------------------|--------------------|--------------------|--------------------|--------------------|--------------------|---------|
| PiD | Frontal           | 80        | 20 | Frontal  | 0.33     | 0.40               | <b><u>0.77</u></b> | <b><u>0.72</u></b> | 0.66               | <b><u>0.81</u></b> | <b><u>0.85</u></b> | 0.81    |
|     | Parietal          | 60        | 15 | 0        | Parietal | 0.33               | <b><u>0.58</u></b> | <u>0.50</u>        | 0.40               | <b><u>0.63</u></b> | <b><u>0.68</u></b> | 0.63    |
|     | Temporal          | 72        | 18 | 0.25     | 0.42     | Temporal           | <b><u>0.66</u></b> | 0.75               | 0.70               | <b><u>0.81</u></b> | <b><u>0.75</u></b> | 0.77    |
|     | Occipital         | 12        | 3  | <u>0</u> | <u>0</u> | <u>0</u>           | Occipital          | 0.18               | <b><u>0.11</u></b> | 0.15               | 0.10               | 0.15    |
|     | Amygdala          | 40        | 10 | <u>0</u> | <u>0</u> | 0.40               | 0.43               | Amygdala           | 0.11               | <u>0.38</u>        | <u>0.42</u>        | 0.36    |
|     | Striatum          | 56        | 14 | 0.25     | 0.14     | 0.50               | <b><u>0.55</u></b> | 0.33               | Striatum           | <b><u>0.52</u></b> | <b><u>0.60</u></b> | 0.52    |
|     | Substantia nigra  | 12        | 3  | <u>0</u> | <u>0</u> | <b><u>0.33</u></b> | 0.10               | <u>0</u>           | <u>0</u>           | Sub<br>nigra       | 0.14               | 0.09    |
|     | Pons              | 4         | 1  | <u>0</u> | <u>0</u> | <u>0</u>           | 0                  | <u>0.08</u>        | <b><u>0.11</u></b> | 0.05               | Pons               | 0.05    |
|     | Medulla oblongata | 0         | 0  | 0        | 0        | 0                  | 0                  | 0                  | 0                  | 0                  | 0                  | Med Obl |

**Table 6.** Pairwise conditional probability matrices and logistic regressions for different types of ARTAG in the amygdala, frontal region and mesencephalon. Bold and underlined indicates significant values ( $p < 0.01$ ) and italics a p value under 0.05. SP: subpial, SE: subependymal, GM: gray matter, WM: white matter, PV: perivascular.

|                      |                    |                    |                     |                    |                    |                    |                    |                    |
|----------------------|--------------------|--------------------|---------------------|--------------------|--------------------|--------------------|--------------------|--------------------|
| <b>Amygdala</b>      |                    |                    |                     |                    |                    |                    |                    |                    |
| n=223                | SP                 | <b><u>0.47</u></b> | 0.65                | 0.40               | 0.36               | <b><u>0.59</u></b> | <b><u>0.61</u></b> | <b><u>0.80</u></b> |
|                      | <b><u>0.18</u></b> | SE                 | <b><u>0.27</u></b>  | <b><u>0.13</u></b> | <b><u>0.13</u></b> | <i>0.27</i>        | 0.27               | <b><u>0.20</u></b> |
|                      | 0.63               | <b><u>0.51</u></b> | GM                  | 0.63               | 0.53               | <b><u>0.41</u></b> | <b><u>0.41</u></b> | <b><u>0.20</u></b> |
|                      | 0.46               | <b><u>0.50</u></b> | 0.69                | WM                 | <b><u>0.26</u></b> | <b><u>0.64</u></b> | <b><u>0.62</u></b> | <b><u>0.40</u></b> |
|                      | 0.27               | <b><u>0.36</u></b> | 0.49                | <b><u>0.06</u></b> | PV                 | <b><u>0.52</u></b> | <b><u>0.52</u></b> | <b><u>0.60</u></b> |
|                      | <b><u>0.27</u></b> | <i>0.18</i>        | <b><u>0.009</u></b> | <b><u>0.29</u></b> | <b><u>0.25</u></b> | Grains             | <i>0.03</i>        | <b><u>0</u></b>    |
|                      | <b><u>0.35</u></b> | 0.23               | <b><u>0.07</u></b>  | <b><u>0.30</u></b> | <b><u>0.30</u></b> | <i>0.09</i>        | OG                 | <b><u>0</u></b>    |
|                      | <b><u>0.99</u></b> | <b><u>0.97</u></b> | <b><u>0.96</u></b>  | <b><u>0.96</u></b> | <b><u>0.98</u></b> | <b><u>0.97</u></b> | <b><u>0.97</u></b> | Neuron             |
| <b>Frontal</b>       |                    |                    |                     |                    |                    |                    |                    |                    |
| n=50                 | SP                 | 0.29               | 0.48                | 0.33               | <b><u>0.51</u></b> |                    |                    |                    |
|                      | 0.45               | GM                 | 0.76                | 0.58               | <b><u>0.71</u></b> |                    |                    |                    |
|                      | 0.69               | 0.77               | WM                  | <b><u>0.36</u></b> | <b><u>0.14</u></b> |                    |                    |                    |
|                      | 0.31               | 0.44               | <b><u>0.08</u></b>  | PV                 | <b><u>0</u></b>    |                    |                    |                    |
|                      | <b><u>0.91</u></b> | <b><u>0.92</u></b> | <b><u>0.76</u></b>  | <b><u>0.80</u></b> | Neuron             |                    |                    |                    |
| <b>Mesencephalon</b> |                    |                    |                     |                    |                    |                    |                    |                    |
| n=29                 | SP                 | <b><u>0.50</u></b> | 0.92                | <b><u>0.50</u></b> | <b><u>0.50</u></b> | 0.50               |                    |                    |
|                      | <b><u>0</u></b>    | SE                 | <b><u>0.16</u></b>  | 0.08               | 0.08               | <b><u>0</u></b>    |                    |                    |
|                      | 0.92               | <b><u>0.61</u></b> | GM                  | <b><u>0.52</u></b> | <b><u>0.57</u></b> | 0.50               |                    |                    |
|                      | <b><u>0.07</u></b> | 0.19               | <b><u>0.15</u></b>  | WM                 | 0.04               | <b><u>0</u></b>    |                    |                    |
|                      | <b><u>0</u></b>    | 0.11               | <b><u>0.15</u></b>  | 0.11               | PV                 | <b><u>0</u></b>    |                    |                    |
|                      | 0.76               | <b><u>0.76</u></b> | 0.76                | <b><u>0.75</u></b> | <b><u>0.76</u></b> | Neuron             |                    |                    |

| Amygdala SP |        | Regressions coeff B | SE    | Wald   | p value | Exp(B) | 95% CI for EXP(B) |       |
|-------------|--------|---------------------|-------|--------|---------|--------|-------------------|-------|
|             |        |                     |       |        |         |        | lower             | upper |
| single      | AMY_GM | -1,046              | 0,279 | 14,007 | 0,000   | 0,351  | 0,203             | 0,608 |
| multiple    | AMY_GM | -0,888              | 0,308 | 8,294  | 0,004   | 0,411  | 0,225             | 0,753 |
|             | AGE    | 0,028               | 0,018 | 2,350  | 0,125   | 1,028  | 0,992             | 1,066 |
|             | SEX    | -0,086              | 0,297 | 0,084  | 0,771   | 0,917  | 0,512             | 1,643 |
|             | BRAAK  | 0,100               | 0,090 | 1,244  | 0,265   | 1,105  | 0,927             | 1,318 |
| single      | AMY_WM | 0,879               | 0,279 | 9,899  | 0,002   | 2,409  | 1,393             | 4,167 |
| multiple    | AMY_WM | 0,709               | 0,293 | 5,865  | 0,015   | 2,032  | 1,145             | 3,607 |
|             | AGE    | 0,019               | 0,018 | 1,055  | 0,304   | 1,019  | 0,983             | 1,056 |
|             | SEX    | 0,066               | 0,295 | 0,050  | 0,822   | 1,069  | 0,599             | 1,907 |
|             | BRAAK  | 0,162               | 0,084 | 3,696  | 0,055   | 1,175  | 0,997             | 1,386 |
| single      | AMY_PV | 1,479               | 0,291 | 25,796 | 0,000   | 4,388  | 2,480             | 7,765 |
| multiple    | AMY_PV | 1,462               | 0,306 | 22,803 | 0,000   | 4,313  | 2,367             | 7,858 |
|             | AGE    | 0,013               | 0,019 | 0,490  | 0,484   | 1,014  | 0,976             | 1,052 |
|             | SEX    | 0,305               | 0,315 | 0,939  | 0,333   | 1,357  | 0,732             | 2,515 |
|             | BRAAK  | 0,162               | 0,087 | 3,513  | 0,061   | 1,176  | 0,993             | 1,394 |
| single      | AMY_SE | 0,830               | 0,322 | 6,630  | 0,010   | 2,293  | 1,219             | 4,314 |
| multiple    | AMY_SE | 0,804               | 0,332 | 5,858  | 0,016   | 2,234  | 1,165             | 4,284 |



|       |       |       |       |       |       |       |       |
|-------|-------|-------|-------|-------|-------|-------|-------|
| AGE   | 0,024 | 0,018 | 1,730 | 0,188 | 1,024 | 0,988 | 1,062 |
| SEX   | 0,091 | 0,297 | 0,094 | 0,759 | 1,095 | 0,613 | 1,959 |
| BRAAK | 0,182 | 0,083 | 4,790 | 0,029 | 1,200 | 1,019 | 1,412 |

single

|           |        |       |        |       |       |       |       |
|-----------|--------|-------|--------|-------|-------|-------|-------|
| MTL_Grain | -1,949 | 0,473 | 16,991 | 0,000 | 0,142 | 0,056 | 0,360 |
|-----------|--------|-------|--------|-------|-------|-------|-------|

multiple

|           |        |       |        |       |       |       |       |
|-----------|--------|-------|--------|-------|-------|-------|-------|
| MTL_Grain | -1,858 | 0,485 | 14,666 | 0,000 | 0,156 | 0,060 | 0,404 |
| AGE       | 0,032  | 0,019 | 2,940  | 0,086 | 1,033 | 0,995 | 1,071 |
| SEX       | 0,004  | 0,304 | 0,000  | 0,990 | 1,004 | 0,553 | 1,821 |
| BRAAK     | 0,131  | 0,086 | 2,308  | 0,129 | 1,140 | 0,963 | 1,350 |

single

|          |        |       |        |       |       |       |       |
|----------|--------|-------|--------|-------|-------|-------|-------|
| AMY_OLIG | -1,653 | 0,377 | 19,171 | 0,000 | 0,192 | 0,091 | 0,401 |
|----------|--------|-------|--------|-------|-------|-------|-------|

multiple

|          |        |       |        |       |       |       |       |
|----------|--------|-------|--------|-------|-------|-------|-------|
| AMY_OLIG | -1,714 | 0,389 | 19,374 | 0,000 | 0,180 | 0,084 | 0,386 |
| AGE      | 0,040  | 0,019 | 4,399  | 0,036 | 1,041 | 1,003 | 1,081 |
| SEX      | -0,017 | 0,307 | 0,003  | 0,956 | 0,983 | 0,539 | 1,794 |
| BRAAK    | 0,156  | 0,086 | 3,337  | 0,068 | 1,169 | 0,989 | 1,383 |

single

|          |        |       |       |       |       |       |       |
|----------|--------|-------|-------|-------|-------|-------|-------|
| AMY_NEUR | -1,321 | 1,126 | 1,376 | 0,241 | 0,267 | 0,029 | 2,426 |
|----------|--------|-------|-------|-------|-------|-------|-------|

multiple

|          |        |       |       |       |       |       |       |
|----------|--------|-------|-------|-------|-------|-------|-------|
| AMY_NEUR | -2,322 | 1,168 | 3,949 | 0,047 | 0,098 | 0,010 | 0,969 |
| AGE      | 0,033  | 0,018 | 3,293 | 0,070 | 1,034 | 0,997 | 1,072 |
| SEX      | -0,052 | 0,294 | 0,032 | 0,859 | 0,949 | 0,534 | 1,688 |
| BRAAK    | 0,240  | 0,085 | 8,041 | 0,005 | 1,272 | 1,077 | 1,501 |

| Amygdala GM |           | Regressions coeff B | SE    | Wald   | p value | Exp(B) | 95% CI for EXP(B) |         |
|-------------|-----------|---------------------|-------|--------|---------|--------|-------------------|---------|
|             |           |                     |       |        |         |        | lower             | upper   |
| single      | AMY_WM    | -0,917              | 0,281 | 10,664 | 0,001   | 0,400  | 0,230             | 0,693   |
| multiple    | AMY_WM    | -0,721              | 0,318 | 5,144  | 0,023   | 0,486  | 0,261             | 0,907   |
|             | AGE       | 0,011               | 0,020 | 0,307  | 0,580   | 1,011  | 0,972             | 1,052   |
|             | SEX       | -0,503              | 0,317 | 2,510  | 0,113   | 0,605  | 0,325             | 1,127   |
|             | BRAAK     | -0,494              | 0,095 | 27,234 | 0,000   | 0,610  | 0,507             | 0,735   |
| single      | AMY_PV    | -0,217              | 0,271 | 0,641  | 0,424   | 0,805  | 0,473             | 1,369   |
| multiple    | AMY_PV    | -0,068              | 0,312 | 0,048  | 0,827   | 0,934  | 0,506             | 1,722   |
|             | AGE       | 0,003               | 0,020 | 0,020  | 0,887   | 1,003  | 0,965             | 1,043   |
|             | SEX       | -0,431              | 0,317 | 1,858  | 0,173   | 0,650  | 0,349             | 1,208   |
|             | BRAAK     | -0,520              | 0,094 | 30,680 | 0,000   | 0,594  | 0,494             | 0,715   |
| single      | AMY_SE    | -0,167              | 0,309 | 0,295  | 0,587   | 0,846  | 0,462             | 1,549   |
| multiple    | AMY_SE    | -0,090              | 0,349 | 0,067  | 0,796   | 0,914  | 0,462             | 1,810   |
|             | AGE       | -0,002              | 0,020 | 0,007  | 0,932   | 0,998  | 0,960             | 1,038   |
|             | SEX       | -0,469              | 0,314 | 2,226  | 0,136   | 0,626  | 0,338             | 1,158   |
|             | BRAAK     | -0,514              | 0,094 | 30,222 | 0,000   | 0,598  | 0,498             | 0,718   |
| single      | MTL_Grain | 3,855               | 1,026 | 14,133 | 0,000   | 47,247 | 6,330             | 352,629 |

|          |           |        |       |        |       |        |       |         |
|----------|-----------|--------|-------|--------|-------|--------|-------|---------|
| multiple | MTL_Grain | 3,604  | 1,039 | 12,023 | 0,001 | 36,753 | 4,792 | 281,893 |
|          | AGE       | -0,006 | 0,021 | 0,087  | 0,768 | 0,994  | 0,955 | 1,035   |
|          | SEX       | -0,552 | 0,337 | 2,681  | 0,102 | 0,576  | 0,298 | 1,115   |
|          | BRAAK     | -0,431 | 0,097 | 19,857 | 0,000 | 0,650  | 0,537 | 0,785   |

|        |          |       |       |        |       |       |       |        |
|--------|----------|-------|-------|--------|-------|-------|-------|--------|
| single | AMY_OLIG | 1,952 | 0,417 | 21,886 | 0,000 | 7,042 | 3,109 | 15,954 |
|--------|----------|-------|-------|--------|-------|-------|-------|--------|

|          |          |        |       |        |       |       |       |        |
|----------|----------|--------|-------|--------|-------|-------|-------|--------|
| multiple | AMY_OLIG | 2,029  | 0,452 | 20,168 | 0,000 | 7,609 | 3,138 | 18,447 |
|          | AGE      | -0,007 | 0,021 | 0,116  | 0,733 | 0,993 | 0,952 | 1,035  |
|          | SEX      | -0,491 | 0,336 | 2,126  | 0,145 | 0,612 | 0,317 | 1,184  |
|          | BRAAK    | -0,529 | 0,099 | 28,635 | 0,000 | 0,589 | 0,485 | 0,715  |

|        |          |       |       |       |       |       |       |        |
|--------|----------|-------|-------|-------|-------|-------|-------|--------|
| single | AMY_NEUR | 1,433 | 1,126 | 1,618 | 0,203 | 4,190 | 0,461 | 38,106 |
|--------|----------|-------|-------|-------|-------|-------|-------|--------|

|          |          |        |       |        |       |        |       |         |
|----------|----------|--------|-------|--------|-------|--------|-------|---------|
| multiple | AMY_NEUR | 3,155  | 1,177 | 7,179  | 0,007 | 23,443 | 2,333 | 235,599 |
|          | AGE      | -0,008 | 0,020 | 0,149  | 0,699 | 0,992  | 0,953 | 1,033   |
|          | SEX      | -0,368 | 0,318 | 1,342  | 0,247 | 0,692  | 0,371 | 1,290   |
|          | BRAAK    | -0,591 | 0,098 | 36,252 | 0,000 | 0,554  | 0,457 | 0,671   |

| Amygdala WM |        | Regressions coeff B | SE    | Wald   | p value | Exp(B) | 95% CI for EXP(B) |         |
|-------------|--------|---------------------|-------|--------|---------|--------|-------------------|---------|
|             |        |                     |       |        |         | lower  |                   | upper   |
| single      | AMY_PV | 3,762               | 0,469 | 64,358 | 0,000   | 43,047 | 17,169            | 107,928 |
| multiple    | AMY_PV | 3,838               | 0,496 | 59,936 | 0,000   | 46,450 | 17,578            | 122,745 |
|             | AGE    | 0,041               | 0,026 | 2,491  | 0,114   | 1,041  | 0,990             | 1,095   |
|             | SEX    | 0,212               | 0,408 | 0,271  | 0,603   | 1,237  | 0,556             | 2,752   |
|             | BRAAK  | 0,262               | 0,114 | 5,267  | 0,022   | 1,300  | 1,039             | 1,626   |

|          |           |        |       |        |       |       |       |        |
|----------|-----------|--------|-------|--------|-------|-------|-------|--------|
| single   | AMY_SE    | 1,207  | 0,353 | 11,698 | 0,001 | 3,343 | 1,674 | 6,675  |
| multiple | AMY_SE    | 1,172  | 0,370 | 10,052 | 0,002 | 3,230 | 1,565 | 6,667  |
|          | AGE       | 0,050  | 0,019 | 6,741  | 0,009 | 1,051 | 1,012 | 1,091  |
|          | SEX       | -0,327 | 0,311 | 1,106  | 0,293 | 0,721 | 0,392 | 1,326  |
|          | BRAAK     | 0,243  | 0,088 | 7,645  | 0,006 | 1,275 | 1,073 | 1,514  |
| single   | MTL_Grain | -1,797 | 0,431 | 17,401 | 0,000 | 0,166 | 0,071 | 0,386  |
| multiple | MTL_Grain | -1,766 | 0,453 | 15,213 | 0,000 | 0,171 | 0,070 | 0,415  |
|          | AGE       | 0,062  | 0,020 | 9,755  | 0,002 | 1,063 | 1,023 | 1,105  |
|          | SEX       | -0,427 | 0,316 | 1,823  | 0,177 | 0,653 | 0,351 | 1,213  |
|          | BRAAK     | 0,167  | 0,090 | 3,465  | 0,063 | 1,182 | 0,991 | 1,409  |
| single   | AMY_OLIG  | -0,826 | 0,332 | 6,165  | 0,013 | 0,438 | 0,228 | 0,840  |
| multiple | AMY_OLIG  | -0,897 | 0,353 | 6,450  | 0,011 | 0,408 | 0,204 | 0,815  |
|          | AGE       | 0,057  | 0,019 | 8,811  | 0,003 | 1,059 | 1,020 | 1,100  |
|          | SEX       | -0,439 | 0,308 | 2,030  | 0,154 | 0,645 | 0,352 | 1,179  |
|          | BRAAK     | 0,242  | 0,087 | 7,748  | 0,005 | 1,273 | 1,074 | 1,509  |
| single   | AMY_NEUR  | 0,734  | 0,923 | 0,632  | 0,427 | 2,083 | 0,341 | 12,725 |
| multiple | AMY_NEUR  | -0,453 | 0,982 | 0,213  | 0,645 | 0,636 | 0,093 | 4,359  |

|       |        |       |       |       |       |       |       |
|-------|--------|-------|-------|-------|-------|-------|-------|
| AGE   | 0,052  | 0,019 | 7,556 | 0,006 | 1,053 | 1,015 | 1,093 |
| SEX   | -0,450 | 0,303 | 2,198 | 0,138 | 0,638 | 0,352 | 1,156 |
| BRAAK | 0,263  | 0,088 | 9,036 | 0,003 | 1,301 | 1,096 | 1,545 |

| <b>Amygdala PV</b> |           | Regressions coeff B | SE    | Wald   | p value | Exp(B) | 95% CI for EXP(B) |       |
|--------------------|-----------|---------------------|-------|--------|---------|--------|-------------------|-------|
|                    |           |                     |       |        |         | lower  |                   | upper |
| single             | MTL_Grain | -1,857              | 0,505 | 13,518 | 0,000   | 0,156  | 0,058             | 0,420 |
| multiple           | MTL_Grain | -1,915              | 0,525 | 13,329 | 0,000   | 0,147  | 0,053             | 0,412 |
|                    | AGE       | 0,056               | 0,019 | 8,300  | 0,004   | 1,057  | 1,018             | 1,098 |
|                    | SEX       | -0,851              | 0,314 | 7,347  | 0,007   | 0,427  | 0,231             | 0,790 |
|                    | BRAAK     | 0,078               | 0,088 | 0,786  | 0,375   | 1,081  | 0,910             | 1,284 |
| single             | AMY_SE    | 1,515               | 0,337 | 20,169 | 0,000   | 4,551  | 2,349             | 8,816 |
| multiple           | AMY_SE    | 1,446               | 0,348 | 17,261 | 0,000   | 4,244  | 2,146             | 8,395 |
|                    | AGE       | 0,044               | 0,019 | 5,186  | 0,023   | 1,045  | 1,006             | 1,086 |
|                    | SEX       | -0,741              | 0,317 | 5,480  | 0,019   | 0,477  | 0,256             | 0,886 |
|                    | BRAAK     | 0,145               | 0,088 | 2,719  | 0,099   | 1,156  | 0,973             | 1,374 |
| single             | AMY_OLIG  | -1,049              | 0,359 | 8,535  | 0,003   | 0,350  | 0,173             | 0,708 |
| multiple           | AMY_OLIG  | -1,172              | 0,377 | 9,637  | 0,002   | 0,310  | 0,148             | 0,649 |
|                    | AGE       | 0,055               | 0,019 | 8,320  | 0,004   | 1,057  | 1,018             | 1,098 |
|                    | SEX       | -0,900              | 0,312 | 8,340  | 0,004   | 0,407  | 0,221             | 0,749 |
|                    | BRAAK     | 0,134               | 0,086 | 2,447  | 0,118   | 1,144  | 0,967             | 1,354 |

|        |          |        |       |       |       |       |       |       |
|--------|----------|--------|-------|-------|-------|-------|-------|-------|
| single | AMY_NEUR | -0,583 | 0,923 | 0,398 | 0,528 | 0,558 | 0,091 | 3,409 |
|--------|----------|--------|-------|-------|-------|-------|-------|-------|

|          |          |        |       |       |       |       |       |       |
|----------|----------|--------|-------|-------|-------|-------|-------|-------|
| multiple | AMY_NEUR | -1,675 | 0,999 | 2,811 | 0,094 | 0,187 | 0,026 | 1,327 |
|          | AGE      | 0,052  | 0,019 | 7,385 | 0,007 | 1,053 | 1,015 | 1,093 |
|          | SEX      | -0,890 | 0,306 | 8,469 | 0,004 | 0,410 | 0,225 | 0,748 |
|          | BRAAK    | 0,200  | 0,087 | 5,345 | 0,021 | 1,222 | 1,031 | 1,448 |

| Amygdala SE |           | Regressions coeff B | SE    | Wald  | p value | Exp(B) | 95% CI for EXP(B) |       |
|-------------|-----------|---------------------|-------|-------|---------|--------|-------------------|-------|
|             |           |                     |       |       |         | lower  |                   | upper |
| single      | MTL_Grain | -0,848              | 0,510 | 2,762 | 0,097   | 0,428  | 0,157             | 1,164 |

|          |           |        |       |       |       |       |       |       |
|----------|-----------|--------|-------|-------|-------|-------|-------|-------|
| multiple | MTL_Grain | -0,802 | 0,524 | 2,338 | 0,126 | 0,448 | 0,160 | 1,254 |
|          | AGE       | 0,019  | 0,021 | 0,868 | 0,351 | 1,019 | 0,979 | 1,062 |
|          | SEX       | -0,585 | 0,340 | 2,952 | 0,086 | 0,557 | 0,286 | 1,086 |
|          | BRAAK     | 0,073  | 0,095 | 0,584 | 0,445 | 1,076 | 0,892 | 1,296 |

|        |          |        |       |       |       |       |       |       |
|--------|----------|--------|-------|-------|-------|-------|-------|-------|
| single | AMY_OLIG | -0,381 | 0,395 | 0,932 | 0,334 | 0,683 | 0,315 | 1,481 |
|--------|----------|--------|-------|-------|-------|-------|-------|-------|

|          |          |        |       |       |       |       |       |       |
|----------|----------|--------|-------|-------|-------|-------|-------|-------|
| multiple | AMY_OLIG | -0,376 | 0,403 | 0,874 | 0,350 | 0,686 | 0,312 | 1,511 |
|          | AGE      | 0,017  | 0,021 | 0,663 | 0,416 | 1,017 | 0,977 | 1,059 |
|          | SEX      | -0,638 | 0,339 | 3,542 | 0,060 | 0,529 | 0,272 | 1,027 |
|          | BRAAK    | 0,111  | 0,093 | 1,426 | 0,232 | 1,118 | 0,931 | 1,342 |

|        |          |       |       |       |       |       |       |        |
|--------|----------|-------|-------|-------|-------|-------|-------|--------|
| single | AMY_NEUR | 0,355 | 1,129 | 0,099 | 0,753 | 1,427 | 0,156 | 13,038 |
|--------|----------|-------|-------|-------|-------|-------|-------|--------|

|          |          |        |       |       |       |       |       |       |
|----------|----------|--------|-------|-------|-------|-------|-------|-------|
| multiple | AMY_NEUR | -0,123 | 1,181 | 0,011 | 0,917 | 0,884 | 0,087 | 8,941 |
|          | AGE      | 0,015  | 0,021 | 0,502 | 0,479 | 1,015 | 0,974 | 1,057 |
|          | SEX      | -0,629 | 0,338 | 3,460 | 0,063 | 0,533 | 0,275 | 1,034 |
|          | BRAAK    | 0,128  | 0,094 | 1,839 | 0,175 | 1,137 | 0,945 | 1,367 |

| Frontal SP |       | Regressions coeff B | SE    | Wald  | p value | Exp(B) | 95% CI for EXP(B) |       |
|------------|-------|---------------------|-------|-------|---------|--------|-------------------|-------|
|            |       |                     |       |       |         |        | lower             | upper |
| single     | FR_GM | -0,116              | 0,638 | 0,033 | 0,856   | 0,891  | 0,255             | 3,109 |
| multiple   | FR_GM | -0,743              | 0,784 | 0,899 | 0,343   | 0,476  | 0,102             | 2,209 |
|            | AGE   | 0,024               | 0,050 | 0,230 | 0,632   | 1,024  | 0,928             | 1,130 |
|            | SEX   | -0,215              | 0,743 | 0,084 | 0,772   | 0,807  | 0,188             | 3,459 |
|            | BRAAK | -0,363              | 0,239 | 2,301 | 0,129   | 0,696  | 0,435             | 1,112 |
| single     | FR_WM | -1,825              | 0,739 | 6,096 | 0,014   | 0,161  | 0,038             | 0,686 |
| multiple   | FR_WM | -1,775              | 0,810 | 4,799 | 0,028   | 0,170  | 0,035             | 0,830 |
|            | AGE   | -0,004              | 0,050 | 0,008 | 0,930   | 0,996  | 0,903             | 1,098 |
|            | SEX   | -0,159              | 0,779 | 0,041 | 0,839   | 0,853  | 0,186             | 3,925 |
|            | BRAAK | -0,038              | 0,253 | 0,022 | 0,882   | 0,963  | 0,586             | 1,583 |
| single     | FR_PV | -0,519              | 0,746 | 0,484 | 0,487   | 0,595  | 0,138             | 2,569 |
| multiple   | FR_PV | -0,182              | 0,821 | 0,049 | 0,825   | 0,834  | 0,167             | 4,168 |
|            | AGE   | 0,007               | 0,048 | 0,019 | 0,891   | 1,007  | 0,917             | 1,106 |

|       |        |       |       |       |       |       |       |
|-------|--------|-------|-------|-------|-------|-------|-------|
| SEX   | -0,133 | 0,729 | 0,033 | 0,855 | 0,876 | 0,210 | 3,652 |
| BRAAK | -0,239 | 0,229 | 1,086 | 0,297 | 0,787 | 0,502 | 1,234 |

|        |         |        |       |       |       |       |       |       |
|--------|---------|--------|-------|-------|-------|-------|-------|-------|
| single | FR_NEUR | -1,451 | 0,845 | 2,946 | 0,086 | 0,234 | 0,045 | 1,229 |
|--------|---------|--------|-------|-------|-------|-------|-------|-------|

|          |         |        |       |       |       |       |       |       |
|----------|---------|--------|-------|-------|-------|-------|-------|-------|
| multiple | FR_NEUR | -1,202 | 1,045 | 1,325 | 0,250 | 0,301 | 0,039 | 2,328 |
|          | AGE     | 0,006  | 0,048 | 0,016 | 0,899 | 1,006 | 0,916 | 1,105 |
|          | SEX     | -0,032 | 0,740 | 0,002 | 0,965 | 0,968 | 0,227 | 4,131 |
|          | BRAAK   | -0,102 | 0,259 | 0,154 | 0,695 | 0,903 | 0,544 | 1,500 |

| Frontal GM | Regressions coeff<br>B | SE | Wald | p value | Exp(B) | 95% CI for EXP(B) |       |
|------------|------------------------|----|------|---------|--------|-------------------|-------|
|            |                        |    |      |         |        | lower             | upper |

|        |       |        |       |        |       |       |       |       |
|--------|-------|--------|-------|--------|-------|-------|-------|-------|
| single | FR_WM | -2,757 | 0,721 | 14,620 | 0,000 | 0,063 | 0,015 | 0,261 |
|--------|-------|--------|-------|--------|-------|-------|-------|-------|

|          |       |        |       |       |       |       |       |       |
|----------|-------|--------|-------|-------|-------|-------|-------|-------|
| multiple | FR_WM | -2,688 | 0,870 | 9,539 | 0,002 | 0,068 | 0,012 | 0,374 |
|          | AGE   | 0,171  | 0,077 | 4,911 | 0,027 | 1,187 | 1,020 | 1,381 |
|          | SEX   | -0,510 | 0,900 | 0,321 | 0,571 | 0,600 | 0,103 | 3,503 |
|          | BRAAK | -0,599 | 0,297 | 4,077 | 0,043 | 0,549 | 0,307 | 0,983 |

|        |       |        |       |       |       |       |       |       |
|--------|-------|--------|-------|-------|-------|-------|-------|-------|
| single | FR_PV | -2,079 | 0,837 | 6,177 | 0,013 | 0,125 | 0,024 | 0,644 |
|--------|-------|--------|-------|-------|-------|-------|-------|-------|

|          |       |        |       |       |       |       |       |       |
|----------|-------|--------|-------|-------|-------|-------|-------|-------|
| multiple | FR_PV | -1,711 | 0,954 | 3,215 | 0,073 | 0,181 | 0,028 | 1,173 |
|          | AGE   | 0,158  | 0,068 | 5,384 | 0,020 | 1,172 | 1,025 | 1,339 |
|          | SEX   | -0,674 | 0,871 | 0,599 | 0,439 | 0,510 | 0,092 | 2,809 |
|          | BRAAK | -0,635 | 0,277 | 5,264 | 0,022 | 0,530 | 0,308 | 0,912 |

|        |         |        |       |       |       |       |       |       |
|--------|---------|--------|-------|-------|-------|-------|-------|-------|
| single | FR_NEUR | -1,302 | 0,894 | 2,122 | 0,145 | 0,272 | 0,047 | 1,568 |
|--------|---------|--------|-------|-------|-------|-------|-------|-------|

|          |         |        |       |       |       |       |       |        |
|----------|---------|--------|-------|-------|-------|-------|-------|--------|
| multiple | FR_NEUR | 0,366  | 1,157 | 0,100 | 0,752 | 1,442 | 0,149 | 13,910 |
|          | AGE     | 0,142  | 0,063 | 5,022 | 0,025 | 1,152 | 1,018 | 1,304  |
|          | SEX     | -0,476 | 0,821 | 0,336 | 0,562 | 0,621 | 0,124 | 3,106  |
|          | BRAAK   | -0,813 | 0,305 | 7,101 | 0,008 | 0,443 | 0,244 | 0,806  |



| <b>Frontal WM</b> |         | Regressions coeff<br>B | SE        | Wald  | p value | Exp(B)        | 95% CI for EXP(B)<br>lower      upper |        |
|-------------------|---------|------------------------|-----------|-------|---------|---------------|---------------------------------------|--------|
| single            | FR_PV   | 2,318                  | 0,840     | 7,613 | 0,006   | 10,154        | 1,957                                 | 52,686 |
| multiple          | FR_PV   | 1,806                  | 0,877     | 4,240 | 0,039   | 6,088         | 1,091                                 | 33,980 |
|                   | AGE     | -0,023                 | 0,052     | 0,188 | 0,664   | 0,978         | 0,882                                 | 1,083  |
|                   | SEX     | -0,038                 | 0,752     | 0,003 | 0,960   | 0,963         | 0,221                                 | 4,203  |
|                   | BRAAK   | 0,490                  | 0,255     | 3,703 | 0,054   | 1,632         | 0,991                                 | 2,689  |
| single            | FR_NEUR | 2,079                  | 1,124     | 3,421 | 0,064   | 8,000         | 0,883                                 | 72,449 |
| multiple          | FR_NEUR | 0,872                  | 1,297     | 0,452 | 0,501   | 2,392         | 0,188                                 | 30,378 |
|                   | AGE     | -0,029                 | 0,046     | 0,399 | 0,528   | 0,971         | 0,887                                 | 1,063  |
|                   | SEX     | -0,150                 | 0,696     | 0,047 | 0,829   | 0,860         | 0,220                                 | 3,367  |
|                   | BRAAK   | 0,555                  | 0,269     | 4,269 | 0,039   | 1,742         | 1,029                                 | 2,949  |
| <b>Frontal PV</b> |         | Regressions coeff<br>B | SE        | Wald  | p value | Exp(B)        | 95% CI for EXP(B)<br>lower      upper |        |
| single            | FR_NEUR | 20,510                 | 15191,513 | 0,000 | 0,999   | 807737366,945 | 0,000                                 |        |
| multiple          | FR_NEUR | 19,060                 | 14849,039 | 0,000 | 0,999   | 189519982,961 | 0,000                                 |        |
|                   | AGE     | -0,031                 | 0,048     | 0,424 | 0,515   | 0,969         | 0,882                                 | 1,065  |
|                   | SEX     | -0,343                 | 0,725     | 0,224 | 0,636   | 0,709         | 0,171                                 | 2,939  |
|                   | BRAAK   | 0,632                  | 0,359     | 3,102 | 0,078   | 1,881         | 0,931                                 | 3,799  |

| <b>Mesencephalon SP</b> |             | Regressions<br>coeff B | SE        | Wald  | p value | Exp(B)         | 95% CI for EXP(B) |        |
|-------------------------|-------------|------------------------|-----------|-------|---------|----------------|-------------------|--------|
|                         |             |                        |           |       |         |                | lower             | upper  |
| single                  | SN_GM       | -22,302                | 11602,712 | 0,000 | 0,998   | 0,000          | 0,000             |        |
| multiple                | SN_GM       | -22,423                | 11575,222 | 0,000 | 0,998   | 0,000          | 0,000             |        |
|                         | AGE         | -0,004                 | 0,116     | 0,001 | 0,974   | 0,996          | 0,794             | 1,250  |
|                         | SEX         | -0,211                 | 1,498     | 0,020 | 0,888   | 0,810          | 0,043             | 15,255 |
|                         | BRAAK       | -0,126                 | 0,447     | 0,080 | 0,777   | 0,881          | 0,367             | 2,117  |
| single                  | PEDUNCLE_WM | 21,203                 | 20096,485 | 0,000 | 0,999   | 1615474842,851 | 0,000             |        |
| multiple                | PEDUNCLE_WM | 21,846                 | 19523,567 | 0,000 | 0,999   | 3073955897,650 | 0,000             |        |
|                         | AGE         | -0,023                 | 0,076     | 0,094 | 0,760   | 0,977          | 0,841             | 1,135  |
|                         | SEX         | 1,925                  | 0,957     | 4,044 | 0,044   | 6,852          | 1,050             | 44,706 |
|                         | BRAAK       | -0,162                 | 0,325     | 0,248 | 0,618   | 0,850          | 0,449             | 1,609  |
| single                  | MES_PV      | 21,123                 | 23205,422 | 0,000 | 0,999   | 1491207547,247 | 0,000             |        |
| multiple                | MES_PV      | 21,121                 | 22423,315 | 0,000 | 0,999   | 1488114893,518 | 0,000             |        |
|                         | AGE         | -0,034                 | 0,073     | 0,221 | 0,638   | 0,966          | 0,838             | 1,115  |
|                         | SEX         | 1,384                  | 0,910     | 2,311 | 0,128   | 3,991          | 0,670             | 23,773 |
|                         | BRAAK       | -0,201                 | 0,310     | 0,421 | 0,516   | 0,818          | 0,445             | 1,502  |
| single                  | AQM_SE      | 21,123                 | 28420,721 | 0,000 | 0,999   | 1491207547,247 | 0,000             |        |
| multiple                | AQM_SE      | 20,761                 | 28327,245 | 0,000 | 0,999   | 1038158993,725 | 0,000             |        |
|                         | AGE         | 0,002                  | 0,081     | 0,001 | 0,978   | 1,002          | 0,856             | 1,174  |
|                         | SEX         | 0,968                  | 0,908     | 1,137 | 0,286   | 2,633          | 0,444             | 15,610 |
|                         | BRAAK       | -0,178                 | 0,316     | 0,319 | 0,572   | 0,837          | 0,450             | 1,555  |

|          |         |        |       |       |       |       |       |        |
|----------|---------|--------|-------|-------|-------|-------|-------|--------|
| single   | SN_NEUR | 0,368  | 0,925 | 0,158 | 0,691 | 1,444 | 0,236 | 8,844  |
| multiple | SN_NEUR | 0,198  | 0,982 | 0,041 | 0,840 | 1,219 | 0,178 | 8,350  |
|          | AGE     | -0,012 | 0,070 | 0,031 | 0,860 | 0,988 | 0,862 | 1,132  |
|          | SEX     | 1,340  | 0,869 | 2,380 | 0,123 | 3,821 | 0,696 | 20,977 |
|          | BRAAK   | -0,197 | 0,305 | 0,418 | 0,518 | 0,821 | 0,452 | 1,492  |

| <b>Mesencephalon GM</b> |             | Regressions<br>coeff B | SE        | Wald  | p value | Exp(B)        | 95% CI for EXP(B)<br>lower upper |        |
|-------------------------|-------------|------------------------|-----------|-------|---------|---------------|----------------------------------|--------|
| single                  | PEDUNCLE_WM | 0,932                  | 1,225     | 0,578 | 0,447   | 2,538         | 0,230                            | 28,021 |
| multiple                | PEDUNCLE_WM | 0,436                  | 1,342     | 0,106 | 0,745   | 1,547         | 0,111                            | 21,476 |
|                         | AGE         | 0,014                  | 0,074     | 0,035 | 0,851   | 1,014         | 0,878                            | 1,171  |
|                         | SEX         | -1,987                 | 0,946     | 4,412 | 0,036   | 0,137         | 0,021                            | 0,875  |
|                         | BRAAK       | 0,169                  | 0,316     | 0,285 | 0,593   | 1,184         | 0,637                            | 2,198  |
| single                  | MES_PV      | 19,357                 | 16408,711 | 0,000 | 0,999   | 255074970,780 | 0,000                            |        |
| multiple                | MES_PV      | 19,340                 | 15858,093 | 0,000 | 0,999   | 250792352,865 | 0,000                            |        |
|                         | AGE         | 0,132                  | 0,134     | 0,972 | 0,324   | 1,141         | 0,877                            | 1,485  |
|                         | SEX         | 0,018                  | 1,492     | 0,000 | 0,990   | 1,019         | 0,055                            | 18,952 |
|                         | BRAAK       | -0,115                 | 0,492     | 0,055 | 0,815   | 0,891         | 0,339                            | 2,338  |
| single                  | AQM_SE      | -19,699                | 10048,243 | 0,000 | 0,998   | 0,000         | 0,000                            |        |
| multiple                | AQM_SE      | -19,193                | 8331,703  | 0,000 | 0,998   | 0,000         | 0,000                            |        |
|                         | AGE         | 0,070                  | 0,150     | 0,217 | 0,641   | 1,072         | 0,800                            | 1,438  |
|                         | SEX         | 18,013                 | 8554,169  | 0,000 | 0,998   | 66532033,878  | 0,000                            |        |
|                         | BRAAK       | 0,912                  | 0,927     | 0,967 | 0,325   | 2,489         | 0,404                            | 15,323 |
| single                  | SN_NEUR     | 0,368                  | 0,925     | 0,158 | 0,691   | 1,444         | 0,236                            | 8,844  |

|          |         |        |       |       |       |       |       |        |
|----------|---------|--------|-------|-------|-------|-------|-------|--------|
| multiple | SN_NEUR | 0,962  | 1,111 | 0,749 | 0,387 | 2,617 | 0,296 | 23,106 |
|          | AGE     | 0,018  | 0,072 | 0,062 | 0,803 | 1,018 | 0,884 | 1,172  |
|          | SEX     | -2,260 | 1,002 | 5,088 | 0,024 | 0,104 | 0,015 | 0,744  |
|          | BRAAK   | 0,156  | 0,326 | 0,229 | 0,632 | 1,169 | 0,617 | 2,216  |

| <b>Mesencephalon WM</b> |         | Regressions<br>coeff B | SE        | Wald  | p value | Exp(B)         | 95% CI for EXP(B)<br>lower upper |         |
|-------------------------|---------|------------------------|-----------|-------|---------|----------------|----------------------------------|---------|
| single                  | MES_PV  | 3,135                  | 1,430     | 4,811 | 0,028   | 23,000         | 1,396                            | 378,898 |
| multiple                | MES_PV  | 21,207                 | 10925,419 | 0,000 | 0,998   | 1622299881,068 | 0,000                            |         |
|                         | AGE     | 0,075                  | 0,181     | 0,173 | 0,678   | 1,078          | 0,756                            | 1,538   |
|                         | SEX     | 19,277                 | 10925,419 | 0,000 | 0,999   | 235337738,216  | 0,000                            |         |
|                         | BRAAK   | -0,167                 | 0,688     | 0,059 | 0,808   | 0,846          | 0,220                            | 3,259   |
| single                  | AQM_SE  | -18,852                | 20096,485 | 0,000 | 0,999   | 0,000          | 0,000                            |         |
| multiple                | AQM_SE  | -19,194                | 15654,565 | 0,000 | 0,999   | 0,000          | 0,000                            |         |
|                         | AGE     | 0,153                  | 0,191     | 0,641 | 0,423   | 1,165          | 0,802                            | 1,693   |
|                         | SEX     | 18,979                 | 9211,921  | 0,000 | 0,998   | 174829850,504  | 0,000                            |         |
|                         | BRAAK   | 0,866                  | 1,002     | 0,746 | 0,388   | 2,376          | 0,333                            | 16,943  |
| single                  | SN_NEUR | 19,699                 | 16408,713 | 0,000 | 0,999   | 358994421,706  | 0,000                            |         |
| multiple                | SN_NEUR | 20,557                 | 14935,457 | 0,000 | 0,999   | 846406351,836  | 0,000                            |         |
|                         | AGE     | 0,129                  | 0,132     | 0,953 | 0,329   | 1,138          | 0,878                            | 1,474   |
|                         | SEX     | -2,208                 | 1,554     | 2,017 | 0,156   | 0,110          | 0,005                            | 2,314   |
|                         | BRAAK   | -0,280                 | 0,459     | 0,373 | 0,542   | 0,756          | 0,308                            | 1,857   |

| <b>Mesencephalon PV</b> |        | Regressions<br>coeff B | SE        | Wald  | p value | Exp(B) | 95% CI for EXP(B)<br>lower upper |  |
|-------------------------|--------|------------------------|-----------|-------|---------|--------|----------------------------------|--|
| single                  | AQM_SE | -19,210                | 28420,722 | 0,000 | 0,999   | 0,000  | 0,000                            |  |
| multiple                | AQM_SE | -20,295                | 25759,238 | 0,000 | 0,999   | 0,000  | 0,000                            |  |

|       |        |       |       |       |       |       |        |
|-------|--------|-------|-------|-------|-------|-------|--------|
| AGE   | 0,163  | 0,156 | 1,085 | 0,298 | 1,177 | 0,866 | 1,598  |
| SEX   | 0,725  | 1,358 | 0,285 | 0,594 | 2,064 | 0,144 | 29,538 |
| BRAAK | -0,056 | 0,496 | 0,013 | 0,910 | 0,945 | 0,357 | 2,500  |

|        |         |        |           |       |       |               |       |
|--------|---------|--------|-----------|-------|-------|---------------|-------|
| single | SN_NEUR | 19,357 | 16408,711 | 0,000 | 0,999 | 255074970,780 | 0,000 |
|--------|---------|--------|-----------|-------|-------|---------------|-------|

|          |         |        |           |       |       |               |        |
|----------|---------|--------|-----------|-------|-------|---------------|--------|
| multiple | SN_NEUR | 19,340 | 15858,093 | 0,000 | 0,999 | 250792352,865 | 0,000  |
|          | AGE     | 0,132  | 0,134     | 0,972 | 0,324 | 1,141         | 1,485  |
|          | SEX     | 0,018  | 1,492     | 0,000 | 0,990 | 1,019         | 18,952 |
|          | BRAAK   | -0,115 | 0,492     | 0,055 | 0,815 | 0,891         | 2,338  |

| <b>Mesencephalon SE</b> |         | Regressions<br>coeff B | SE        | Wald  | p value | Exp(B)        | 95% CI for EXP(B)<br>lower upper |        |
|-------------------------|---------|------------------------|-----------|-------|---------|---------------|----------------------------------|--------|
| single                  | SN_NEUR | 18,952                 | 16408,711 | 0,000 | 0,999   | 170049976,224 | 0,000                            |        |
| multiple                | SN_NEUR | 18,229                 | 13799,901 | 0,000 | 0,999   | 82548832,881  | 0,000                            |        |
|                         | AGE     | 0,045                  | 0,160     | 0,078 | 0,781   | 1,046         | 0,764                            | 1,431  |
|                         | SEX     | 18,893                 | 9865,946  | 0,000 | 0,998   | 160422999,901 | 0,000                            |        |
|                         | BRAAK   | 0,588                  | 0,914     | 0,414 | 0,520   | 1,800         | 0,300                            | 10,804 |
