# Supplementary material for: Sequential stages and distribution patterns of aging-related tau astrogliopathy (ARTAG) in the human brain
Source: Springer Nature journal article supplement (doi:10.1186/s40478-018-0552-y), 2018-06-11

**Sequential stages and distribution patterns of aging-related tau astrogliopathy (ARTAG) in the human brain**

Gabor G. Kovacs<sup>1,2</sup>, Sharon X. Xie<sup>3</sup>, John L. Robinson<sup>2</sup>, Edward B. Lee<sup>2</sup>, Douglas H. Smith<sup>4</sup>, Theresa Schuck<sup>2</sup>, Virginia M.-Y. Lee<sup>2</sup>, and John Q. Trojanowski<sup>2</sup>

1: Institute of Neurology, Medical University of Vienna, Vienna, Austria; 2: Center for Neurodegenerative Disease Research (CNDR), Institute on Aging and Department of Pathology & Laboratory Medicine; 3: Department of Biostatistics and Epidemiology; 4: Department of Neurosurgery, Center for Brain Injury and Repair, the Perelman School of Medicine (PSOM) at the University of Pennsylvania, Philadelphia, PA, USA.

**SUPPLEMENTAL FILE 4**

**Figure 1.** Hierarchical cluster analysis of **primary astrocytic tau pathology** in PSP, CBD, Pick disease and pooled cohort of primary non-FTLD-tauopathies. LOB: lobar; SC/AM: subcortical and amygdala; BST: brainstem.

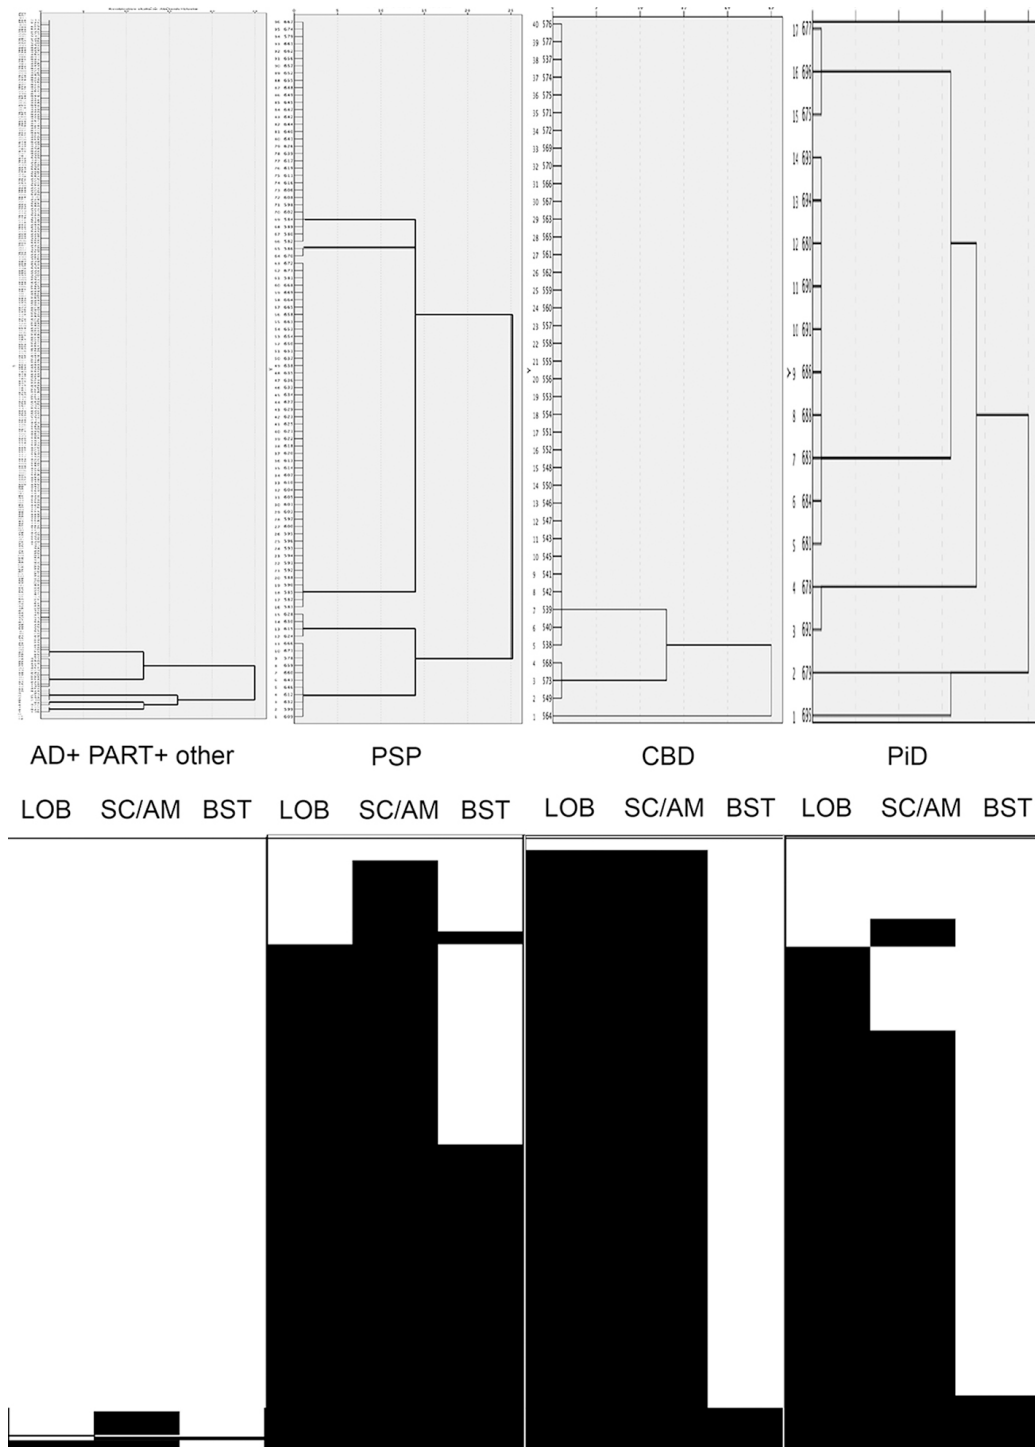

**Figure 2.** Hierarchical cluster analysis of **gray matter (GM) ARTAG and primary astrocytic tau pathology** (indicated as “Astro”) in PSP, CBD, Pick disease and pooled cohort of primary non-FTLD-tauopathies. Lb: lobar; A/Sc: amygdala and subcortical; BST: brainstem.

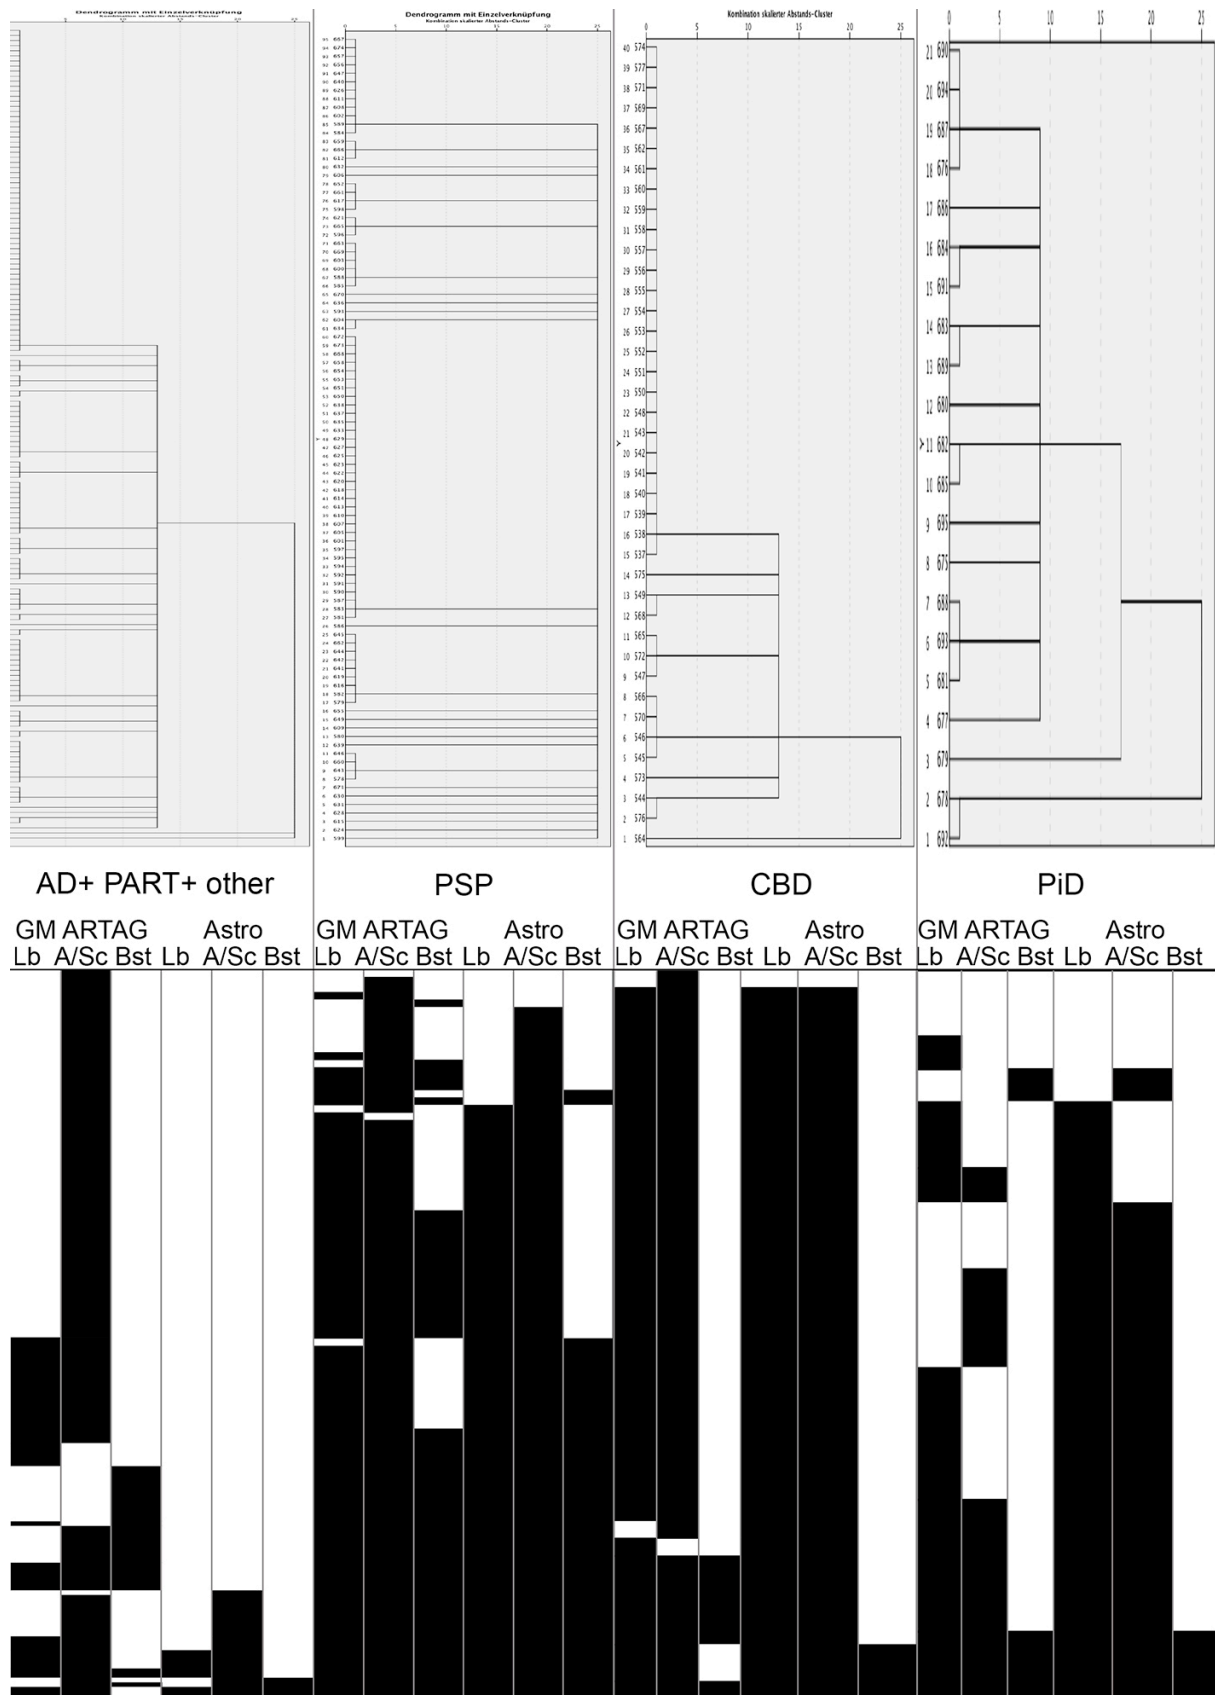

**Figure 3.** Hierarchical cluster analysis of subpial (SP), white (WM) and grey matter (GM) in three major regions (L: lobar; S: subcortical; B: basal brain regions including medial temporal lobe) in the pooled cohort of PART, AD and other non FTL D-tauopathies, PSP, CBD; and Pick disease. The lower part of the images shows the patterns with black boxes indicating the presence and white boxes the lack of a specific type of ARTAG in a specific region.

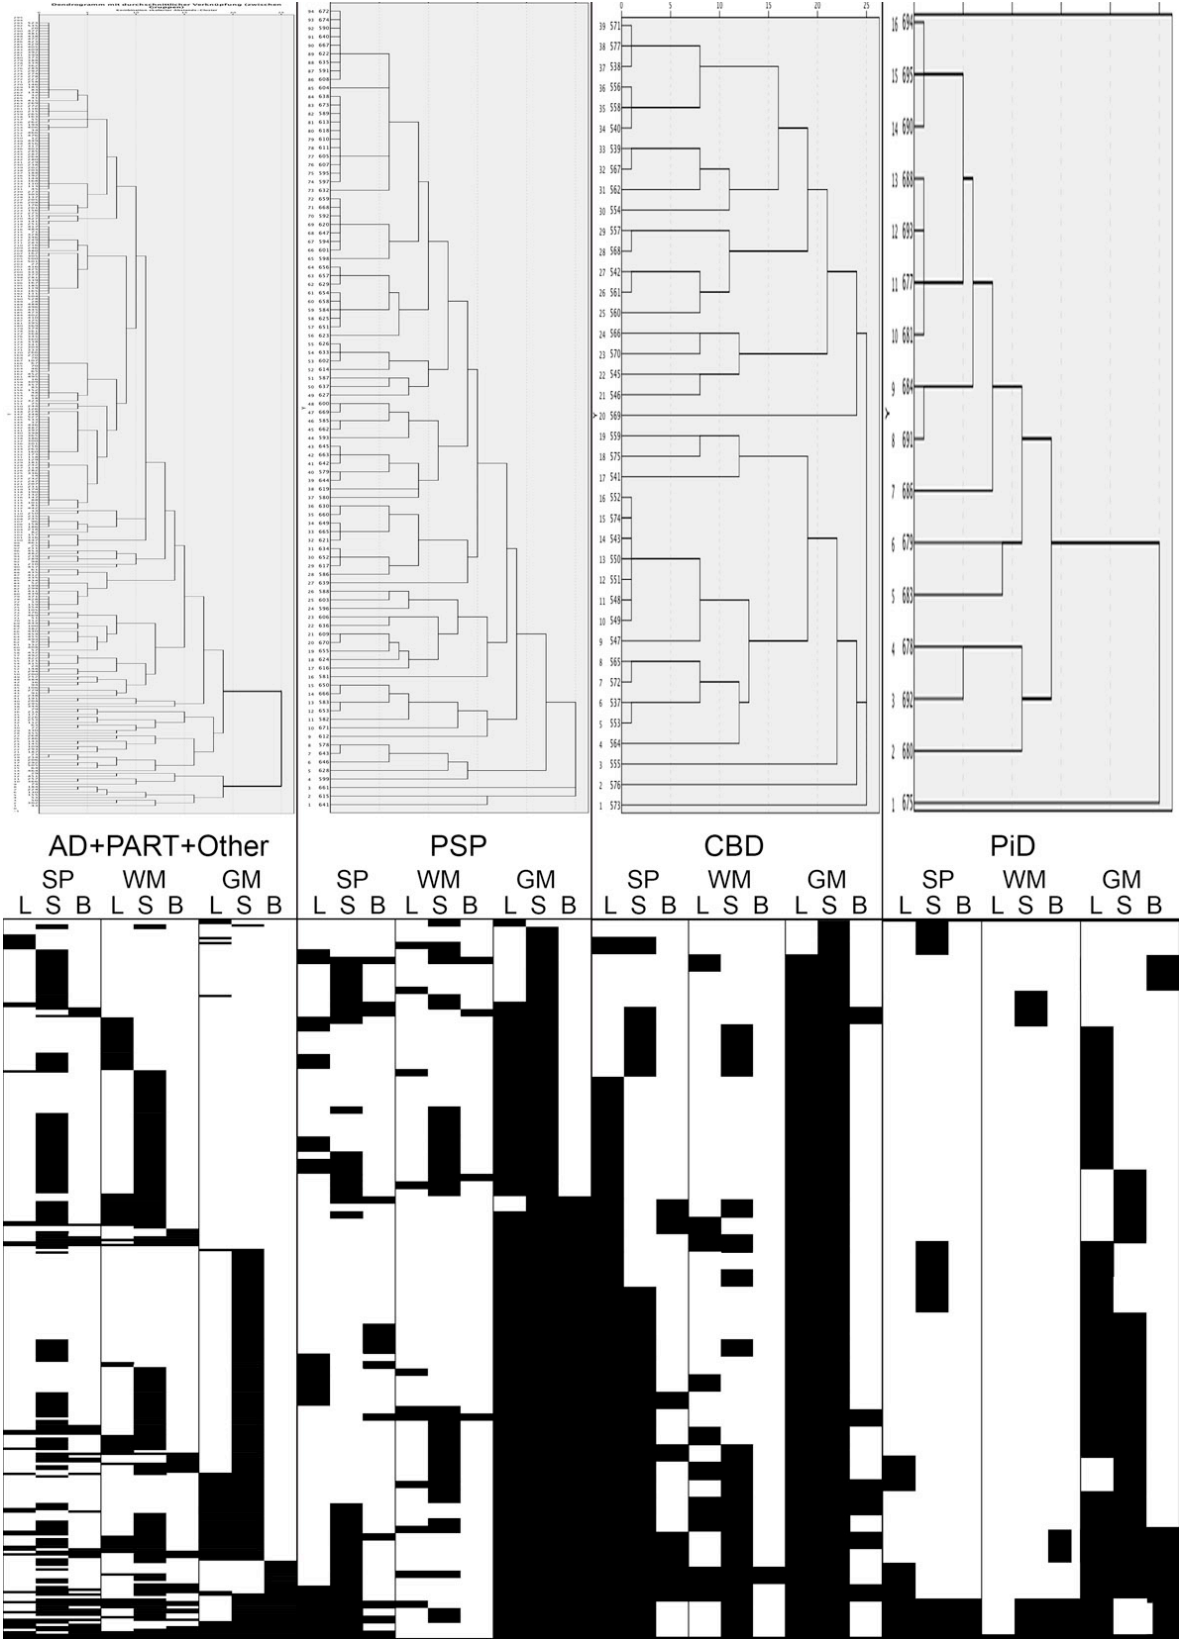

Supplement: MOESM4 [file 25666420]
